1 **JQ-1 ameliorates schistosomiasis liver granuloma in mice by suppressing male and**  
2 **female reproductive systems and egg development of *Schistosoma japonicum***

3 **Short title: JQ-1 ameliorates schistosomiasis liver granuloma in mice**

4 Jiaming Tian<sup>1</sup>, Bingxin Dai<sup>1</sup>, Li Gong<sup>1</sup>, Pingping Wang<sup>1</sup>, Han Ding<sup>1</sup>, Siwei Xia<sup>2</sup>, Weice  
5 Sun<sup>2</sup>, Cuiping Ren<sup>1</sup>, Jijia Shen<sup>1\*</sup>, Miao Liu<sup>1\*</sup>

6 *1.Department of Microbiology and Parasitology, Anhui Provincial Laboratory of*  
7 *Microbiology and Parasitology, Anhui Key Laboratory of Zoonoses, School of Basic*  
8 *Medical Sciences, Anhui Medical University, 81#Meishan Road, Hefei, Anhui 230032,*  
9 *People's Republic of China ; 2.The Second Clinical Medical College , Anhui Medical*  
10 *University, 81#Meishan Road, Hefei, Anhui 230032, People's Republic of China ;*

11 \*Corresponding author:

12 Miao Liu, E--mail: iammiaoliu@126.com

13 Jijia Shen, E--mail:shenjijia@hotmail.com

14 **Abstract**

15 Schistosomiasis is a serious and widespread parasitic disease caused by infection with  
16 *Schistosoma japonicum*. Because the parasite's eggs are primarily responsible for  
17 schistosomiasis dissemination and pathogenesis, inhibiting egg production is a potential  
18 approach to control the spread and severity of the disease. The bromodomain and extra-  
19 terminal (BET) proteins represent promising targets for the development of epigenetic  
20 drugs against Schistosoma. JQ-1 is a selective inhibitor of the BET protein family. In  
21 the present study, JQ-1 was applied *S. japonicum* in vitro. By using laser confocal

22 scanning microscopy and EdU incorporation assays, we showed that application of JQ-  
23 1 to worms in vitro affected egg laying and the development of both the male and female  
24 reproductive systems. JQ-1 also inhibited the expression of the reproductive-related  
25 genes *SjPlk1* and *SjNanos1* in *S. japonicum*. Mice infected with *S. japonicum* were  
26 treated with JQ-1 during egg granuloma formation. JQ-1 treatment significantly  
27 reduced the size of the liver granulomas and levels of serum alanine aminotransferase  
28 and aspartate aminotransferase in mice and suppressed both egg laying and the  
29 development of male and female *S. japonicum* reproductive systems in vivo. Moreover,  
30 the mRNA expression levels of some proinflammatory cytokines were decreased in the  
31 parasites. Our findings suggest that JQ-1 treatment attenuates *S. japonicum* egg-  
32 induced hepatic granuloma due at least in part to suppressing the development of the  
33 reproductive system and egg production of *S. japonicum*. These findings further suggest  
34 that JQ-1 or other BET inhibitors warrant additional study as a new approach for the  
35 treatment or prevention of schistosomiasis.

36 Keywords: Hepatic granuloma; Reproductive systems; JQ-1; *Schistosoma japonicum*.

### 37 **Author summary**

38 Among neglected tropical diseases, schistosomiasis is a serious disease caused by  
39 infection with the parasite *Schistosomiasis japonicum*. Treatment of schistosomiasis is  
40 currently almost exclusively with praziquantel, which kills mainly adult parasites, with  
41 minimal effectiveness against immature schistosomes and eggs. However, the  
42 parasite's eggs are primarily responsible for schistosomiasis dissemination and  
43 pathology. In addition, overuse of praziquantel in epidemic areas has led to drug

44 resistance and a reduced cure rate. Thus, new parasite targets for the development of  
45 novel therapeutics are crucial. Here, we evaluated the potential of JQ-1, a bromodomain  
46 and extra-terminal protein inhibitor, to suppress the production of *S. japonicum* eggs.  
47 Application of JQ-1 to *S. japonicum* in vitro decreased the number of mature germ cells,  
48 the rates of oviposition, and the number of eggs produced in each male-female pairing.  
49 JQ-1 treatment of mice infected with *S. japonicum* ameliorated hepatic granuloma and  
50 decreased serum liver enzymes, suggesting improved liver function. These results  
51 indicate that JQ-1 inhibits reproductive development and egg production in *S.*  
52 *japonicum*, providing supporting evidence that JQ-1 warrants additional study for use  
53 as a novel approach in the prevention or treatment of schistosomiasis.

## 54 **Introduction**

55 Schistosomiasis is an acute and chronic parasitic disease caused by infection with  
56 Schistosoma, a parasite that is endemic in 78 countries and is responsible for  
57 approximately 280,000 deaths each year [1]. In China, zoonotic schistosomiasis caused  
58 by *S. japonicum* is major public health threat affecting more than a million people and  
59 hundreds of thousands of livestock in China [2].

60 Praziquantel is a widely used, high-efficiency, broad-spectrum, oral antiparasitic  
61 drug for the treatment of various forms of schistosomiasis, but praziquantel kills only  
62 adult worms and is minimally effective against immature schistosomes and eggs [2-3]  
63 In addition, the repeated and large-scale use of praziquantel in epidemic areas has led  
64 to drug resistance and a reduced cure rate [4-5]. Thus, there is an urgent need to identify

65 new targets for the development of novel parasitic therapeutics. Owing to the key role  
66 of fertilized eggs in maintaining the life cycle and inducing pathogenesis [2-3], blocking  
67 egg production is a potential alternative approach to control the occurrence,  
68 development, and spread of schistosomiasis.

69 The bromodomain and extra-terminal (BET) family of proteins specifically  
70 recognizes acetylated lysine residue sites and participates in the regulation of epigenetic  
71 protein expression, which plays a key role in regulating various biological processes  
72 [6]. JQ-1 is a selective inhibitor of BET family proteins and has been shown to have  
73 promising anti-tumor and anti-inflammatory effects [7]. In a pilot study, we used JQ-1  
74 to treat hepatic granuloma caused by infection with *Schistosoma japonicum*. Mice  
75 infected with *S. japonicum* cercariae were injected intraperitoneally with JQ-1 (50  
76 mg/kg) during egg granuloma formation. Unexpectedly, JQ-1 significantly reduced the  
77 size of the liver granuloma and the egg burden; however, JQ-1 treatment had no effect  
78 on worm load. We hypothesized that JQ-1 would be effective in inhibiting egg  
79 production in *S. japonicum* and sought to learn the mechanisms underlying this effect.

80 Thus, the aim of the present study was to confirm that JQ-1 reduces egg production  
81 of *S. japonicum* and to investigate the potential mechanisms undergirding this effect.  
82 To that end, we applied JQ-1 to schistosomes in vitro and assessed the effects on their  
83 reproductive development and egg production. We also treated C57BL/6 mice infected  
84 with *S. japonicum* with JQ-1 to assess the effects of the drug on hepatic granuloma and  
85 liver function. Our findings indicated that JQ-1 inhibited the reproductive development  
86 of males and females and egg production in *S. japonicum* and ameliorated hepatic

87 granuloma and improved liver function in infected mice. These findings lay a  
88 foundation for further study to develop JQ-1 or other BET inhibitors as a new approach  
89 for the treatment and prevention of schistosomiasis.

## 90 **Materials and Methods**

### 91 **Animals and parasites**

92 Female Kunming mice (6-8 weeks old) and female C57BL/6 mice (6-8 weeks old) were  
93 provided by the Experimental Animal Center of Anhui Province in Hefei, China. The  
94 mice were housed under specific pathogen-free conditions at Anhui Medical University.  
95 *Oncomelania hupensis* snails infected with *S. japonicum* (a Chinese mainland strain)  
96 were purchased from the Jiangxi Provincial Institute of Parasitic Diseases in China. All  
97 experiments carried out on animals were conducted in accordance with and were  
98 approved by the Animal Ethics Committee of Anhui Medical University (approval No.  
99 LLSC20170247).

### 100 **Treatment of schistosomes with JQ-1 in vitro**

101 Cercariae were shed in a beaker after exposing 30 *O. hupensis* infected with *S.*  
102 *japonicum* to sunlight for 4 h (25–28 °C). For mixed infections, cercariae released from  
103 several infected *O. hupensis* were used. Kunming mice were infected percutaneously  
104 with 80–90 cercariae and were humanely killed on the 28th day after infection. All  
105 paired parasites were harvested by perfusion and washed three times with RPMI-1640  
106 medium. The worms were then cultured in vitro with RPMI-1640 (Gibco, Grand Island,

107 NY, USA) at 37 °C and 5% CO<sub>2</sub>. The RPMI-1640 medium was supplemented with  
108 10,000 U/mL penicillin, 10 mg/mL streptomycin, 250 µg/mL amphotericin B (Sangon  
109 Biotech, Shanghai, China), 15% fetal calf serum (Gibco), and glutamine (Gibco). For  
110 each experiment, 15 pairs of *S. japonicum* were maintained in a 6-well plate (i.e., 15  
111 pairs/well). JQ-1 (Cat. No. HY-13030, MedChem Express; USA), was dissolved in  
112 dimethyl sulfoxide (DMSO). In each experimental group, 15 paired parasites were  
113 incubated in 3 mL of medium and treated with different concentrations of JQ-1 (0 µM,  
114 5 µM, 10 µM, and 15 µM). All parasites were cultured at 37 °C for 9 d, and culture  
115 media was changed every 24 h. During this time, the viability and morphology of  
116 parasites, worm pairings, and the number of eggs were observed and recorded.

## 117 **Confocal laser scanning microscopy (CLSM)**

118 For morphological analysis, collected worms were fixed in a solution of alcohol (95%),  
119 formalin (3%), and glacial acetic acid (2%)) for at least 24 h. Worms were stained in  
120 hydrochloric acid–carmine dye (Ourchem, Shanghai, China) for 17 h and then destained  
121 in acidic 70% ethanol until the worms turned light pink. The worms were dehydrated  
122 in a graded ethanol series (70%, 90%, and 100%), cleared in 50% xylene diluted in  
123 ethanol and 100% xylene for 1 min each, mounted onto slides with neutral gum, sealed  
124 with cover glass, and laid flat to dry. The morphology of their reproductive organs was  
125 observed with a CLSM (ZEISS LSM 880, Germany) using an emission wavelength of  
126 488 nm. Images were captured and stored at 1024 × 1024 pixels.

## 127 **5-ethynyl-2'-deoxyuridine (EdU)-incorporation assay**

128 For EdU labelling and detection of proliferating cells, paired worms treated with JQ-1  
129 and control worms were incubated with 10 mM of EdU in medium for 24 h.  
130 BeyoClick™ EdU-594 Cell Proliferation Kits (Beyotime, Shanghai, China) were used  
131 to detect EdU incorporation. Couples were separated, fixed, and stained as described  
132 above, with minor alterations. The couples were rinsed twice in PBS and stained with  
133 Hoechst 33342 (diluted 1:1000 in PBS) in the dark for 10 min at room temperature. The  
134 worms were examined by CLSM using a ZEISS LSM 880 confocal microscope at a  
135 wavelength of 405 nm (for Hoechst) and 543 nm (for Azide 594).

### 136 **Treatment of schistosomes with JQ-1 in vivo**

137 Four weeks after mice were infected with *S. japonicum*, mice in the experimental group  
138 were injected intraperitoneally with JQ-1 (50 mg/kg body weight per day), and mice in  
139 the control group were injected intraperitoneally with vehicle, namely, (2-  
140 hydroxypropyl)- $\beta$ -cyclodextrin (HP- $\beta$ -CD; Cat. No. 778966, Sigma; USA) 10%  
141 (wt/vol), once daily for 15 d. Animals were humanely killed 24 h after the last  
142 administration. The parasites, serum, and liver from each mouse were collected for  
143 subsequent experimental analyses.

### 144 **Quantitative PCR**

145 Total RNA from adult *S. japonicum* worms or the liver of each mouse was isolated  
146 using TRIzol® Reagent (Life Technologies, Carlsbad, CA, USA). The total RNA  
147 concentration and purity were detected using a NanoDrop 2000 (Thermo Fisher

148 Scientific, USA). Total RNA (500 ng) from the worms was reverse transcribed into  
149 cDNA by using a PrimeScript RT Reagent Kit (TaKaRa, Dalian, China) according to  
150 the manufacturer's instructions. A reliable reference gene for transcriptomic analysis  
151 of *S. japonicum*, *PSMD4*, was used as a control gene in the assays [8] and GAPDH was  
152 used as a control gene for transcriptomic analysis of the liver. The experiment was  
153 carried out using the StepOnePlus Real-Time PCR System (Applied Biosystems, Foster  
154 City, CA, USA). The relative expression level of each gene was analyzed using SDS  
155 v.1.4 software (Applied Biosystems). The procedure for quantitative PCR was  
156 conducted as described previously [9], and the primers were designed and synthesized  
157 by Sangon Biotech Co. Ltd. The PCR primer sequences are described in the  
158 Supplementary Material.

### 159 **Serum liver enzyme quantification**

160 For assessment of mouse liver function, a serum aminotransferase test kit (Nanjing  
161 Jiancheng Bioengineering Institute, Nanjing, China) was used to measure the levels of  
162 serum alanine aminotransferase (ALT) and aspartate aminotransferase (AST),  
163 according to the manufacturer's instructions. The levels of serum ALT and AST are  
164 reported in units per liter.

### 165 **Egg count in liver tissue**

166 Approximately 0.1 g of liver tissue was taken from each mouse and weighed. Potassium  
167 hydroxide (10%; 1 mL) was added to the liver tissue for digestion at 37 °C for 2 h. The  
168 number of eggs in each sample was then counted using a light microscope.

### 169 **Histology and immunohistochemistry of the liver sections**



170 Fresh liver tissue (1.0 g) was fixed in 1% buffered formalin and embedded in paraffin.  
171 The deparaffinized tissue sections were affixed to slides, and sections (thickness, 4  $\mu\text{m}$ )  
172 were stained with hematoxylin and eosin and examined for quantitative and qualitative  
173 changes. Computer-assisted morphometric software ((Image-Pro Plus; Media  
174 Cybernetics) was used to determine the total areas of the tissue and granuloma on each  
175 slide so that the area of the granulomas could be reported as a percentage of the total  
176 area for each slide. For each specimen, at least three non-continuous slides were  
177 measured, and the mean values obtained from eight mice from each group were used  
178 for statistical analysis.

## 179 **Statistical analysis**

180 Statistical analysis was performed using GraphPad Prism software (version 6.0). All  
181 data were obtained from three independent experiments, each using triplicate samples  
182 and following the same protocol. The statistical significance of the difference between  
183 two data sets was analyzed using Student's t-test, and one-way analysis of variance  
184 (ANOVA) was used for multiple comparisons, followed by Tukey's post hoc tests when  
185 appropriate. Data are presented as means  $\pm$  SEM and were considered statistically  
186 significant for P-values  $< 0.05$ .

## 187 **Results**

### 188 **Effects of JQ-1 treatment on pairing rate and egg production**

189 The number of male-female paired worms was counted on the 10th day of culture to  
190 determine the effect of JQ-1 treatment on the pairing rate. We found that the number of  
191 paired worms in the cultures treated with JQ-1 was similar to that in the control group  
192 treated with vehicle (Fig 1A). No significant changes in schistosome activity or in the  
193 number of viable worms were detected between the JQ-1-treated group and the control  
194 group. However, the number of eggs collected in the medium and counted using light  
195 microscopy was decreased in the cultures treated with JQ-1 compared with controls  
196 (Fig 1 C–F). To further analyze the effects of JQ-1 on egg production in the paired  
197 females, we counted egg numbers and found that compared with the DMSO-treated  
198 group, the number of eggs ( $P < 0.05$ ) in the JQ-1-treated group decreased in a  
199 concentration-dependent manner (Fig 1B).

200 **Fig 1. Effect of JQ-1 on male-female pairing rate, egg production, and egg**  
201 **morphology in *S. japonicum*.** Effects of different concentrations (5  $\mu$ M, 10  $\mu$ M, and  
202 15  $\mu$ M) of JQ-1 application on male-female pairing stability (A), egg production (B),  
203 and egg morphology (C–F) in *S. japonicum* pairs cultured in vitro for 10 days. Data  
204 represent the mean  $\pm$  SEM of three independent experiments. Scale bars: 200  $\mu$ m.  
205 Asterisks show statistical differences ( $***P < 0.001$ ) tested by one-way ANOVA with  
206 multiple comparisons (Tukey's post-hoc test).

207 **JQ-1 treatment decreases mitotic activity in somatic and**  
208 **germ cells**

209 We investigated whether JQ-1 affects mitosis in *S. japonicum* by performing EdU-  
210 incorporation assays using JQ-1-treated worms to assess cell proliferation. Worm pairs  
211 treated with JQ-1 for 10 d exhibited a substantial decrease in the number of EdU-labeled  
212 cells in the gonads, parenchyma, and subtegument of both sexes. In the untreated  
213 control group, a substantial number of EdU-labeled cells were detected in the  
214 vitellarium and ovary of adult females as well as in the testis and parenchyma of adult  
215 males (Fig 2), which indicated high mitotic activity in these organs. Adult worms  
216 treated with JQ-1 for 9 d showed a slight decrease in the number of EdU-positive cells  
217 in the vitellarium of the females and the testis and parenchyma of the males; greater  
218 decreases were observed with increasing concentrations of JQ-1. At the highest  
219 concentration, JQ-1-treated worm organs and tissues had almost no EdU-labeled cells  
220 (Fig 2D, H).

221 **Fig 2. Effect of JQ-1 on cell proliferation in male-female pairs of *S. japonicum*.** Red  
222 signals indicate active mitotic cells labeled by EdU; blue signal, Hoechst-positive cells.  
223 (A–D) Male *S. japonicum* and (E–H) female *S. japonicum*. EdU-incorporated cells are  
224 detected in the testes and parenchyma of untreated males (A) and in the vitellarium and  
225 ovary of untreated females (E). EdU-positive cells are detected after application of JQ-1  
226 at 5  $\mu$ M (B, F), 10  $\mu$ M (C, G), and 15  $\mu$ M (D, H). Scale bars: 200  $\mu$ m.

## 227 **Effects of JQ-1 treatment on reproductive organ development**

228 Consistent with the observed decreased egg production, CLSM analyses of worm pairs  
229 treated with JQ-1 revealed morphologic abnormalities in the gonads of both sexes. After

230 treatment for 10 d, the length and width of the ovaries in females treated with JQ-1 were  
231 significantly smaller than those of untreated controls (Fig 3I–K). In the control group,  
232 no morphological anomalies were observed in the testes of the males (Fig 4A, E) or the  
233 ovaries of the females (Fig 3A, E). Furthermore, the vitellaria of control females  
234 contained differentiating vitellocytes. The ovaries of the DMSO-treated female  
235 schistosomes were composed of small immature oocytes in the anterior part and larger  
236 primary oocytes in the posterior part. The results of CLSM (Fig 4E–H) showed that the  
237 number of spermatozoa in the seminal vesicles of schistosomes in the JQ-1–treated  
238 group was reduced and the development of the spermatozoa was impaired. The testes  
239 of DMSO-treated male schistosomes were composed of several testicular lobes  
240 arranged bead-like, and each testicular lobe contained a large number of spermatocytes  
241 and spermatogonia at different stages. In the group treated with JQ-1, the morphology  
242 of whole germ cells in both the testis and ovary were markedly changed. Those changes  
243 were more obvious with increasing concentrations of JQ-1. In the ovaries, the sizes of  
244 the primary oocytes and immature oocytes were reduced, and the cells of the JQ-1–  
245 treated groups were not as full as the cells of DMSO-treated groups (Fig 3A–D). The  
246 size of the testicular lobes in the group treated with the high concentration of JQ-1 was  
247 much smaller than that in the DMSO-treated group, and the numbers of spermatogonia  
248 and spermatocytes in the male testes were significantly reduced and more loosely  
249 arranged (Fig 4D). Large pore-like structures were observed in the testes and ovaries of  
250 males and females, respectively (Figs 3 and 4, arrows). These morphological changes  
251 in both females and males were greatest after treatment with the highest concentration

252 (15  $\mu$ M) of JQ-1. Compared with controls, the group with JQ-1 treatment showed a  
253 markedly reduced diameter of the testicular lobes (Fig 4I), which was paralleled by a  
254 reduction in cell density within the testes as well as by empty seminal vesicles.

255 **Fig 3. Morphological changes of ovaries and yolk glands in female *S. japonicum***  
256 **treated with JQ-1.** Worms were stained with carmine hydrochloride and analyzed  
257 using confocal laser scanning microscopy. (A, E) Control worms; worms treated with  
258 JQ-1 at 5  $\mu$ M (B, F), 10  $\mu$ M (C, G), and 15  $\mu$ M (D, H). Arrows indicate large pore-like  
259 structures. Abbreviations: ov, ovary; v, vitellarium; (A–H) Scale bars: 20  $\mu$ m.  
260 Comparison of the length, width, and area of the ovary after JQ-1 application at the  
261 indicated concentration (I–K) for 10 d. Data represent the mean  $\pm$  SEM ( $n \geq 15$  for each  
262 group). Asterisks show statistical differences (\*\* $P < 0.05$ , \*\* $P < 0.01$ , \*\*\* $P < 0.001$ )  
263 tested by one-way ANOVA with multiple comparisons.

264 **Fig 4. Morphological changes of spermatozoa in testes and seminal vesicles of *S.***  
265 ***japonicum* treated with JQ-1 in vitro.** Worms were stained with carmine  
266 hydrochloride and analyzed using confocal laser scanning microscopy. (A, E) Control  
267 worms; worms treated with JQ-1 at 5  $\mu$ M (B, F), 10  $\mu$ M (C, G), and 15  $\mu$ M (D, H).  
268 Arrows indicate large pore-like structures. (A–D) Scale bars: 20  $\mu$ m; (E–H) Scale bars:  
269 10  $\mu$ m. Abbreviations: t, testis; SV, sperm vesicle. (I) Comparison of the diameter of  
270 the testicular lobes after JQ-1 application at the indicated concentration for 10 d. Data  
271 represent the mean  $\pm$  SEM ( $n \geq 15$  for each group). Asterisks show statistical

272 differences (\*\* $P < 0.01$ ; \*\*\* $P < 0.001$ ) tested by one-way ANOVA with multiple  
273 comparisons.

## 274 **JQ-1 treatment decreases *SjNanos1*, *SjPlk1* mRNA levels**

275 To explore the mechanisms undergirding the observed effects of JQ-1 on *S. japonicum*,  
276 we used quantitative PCR to detect the levels of the *S. japonicum* protein coding genes  
277 polo-like kinase 1 (*SjPlk1*) and *SjNanos1*, two genes related to schistosome  
278 reproduction, after application of different concentrations of JQ-1 in vitro. Compared  
279 with the control group, the expression levels of *SjPlk1* mRNA in the JQ-1-treated  
280 worms were down-regulated in both males (Fig 5A) and females (Fig 5B), and this  
281 effect was more marked with increasing concentrations of JQ-1. Similarly, the  
282 expression levels of *SjNanos1* mRNA were also down-regulated in both males and  
283 females, and this effect was also more marked with increasing concentrations of JQ-1.

284 **Fig 5. Results of quantitative PCR analyses of *S. japonicum* cultured with or**  
285 **without JQ-1 for 10 days.** Relative transcription level of *Nanos1* in male (A) and  
286 female *S. japonicum* (B). Relative transcription level of *Plk1* in male (C) and female  
287 (D) *S. japonicum*. Data represent the mean  $\pm$  SEM of three independent experiments.  
288 Asterisks show statistical differences (\* $P < 0.05$ ; \*\* $P < 0.01$ ) tested by one-way  
289 ANOVA with multiple comparisons.

## 290 **JQ-1 ameliorates liver granuloma caused by *S. japonicum*** 291 **infection**

292 In the fourth week after *S. japonicum* infection, mice in the experimental group were  
293 injected with JQ-1, and mice in the control group were injected with the vehicle HP- $\beta$ -  
294 CD, once daily for 15 d. All mice were humanely killed after 15 d of treatment (Fig  
295 6A). As shown in Fig 6B, livers obtained from mice in the HP- $\beta$ -CD group had large  
296 agglomeration, and granuloma inflammation was severe. However, there was marked  
297 reduction of liver surface granulomatous nodules in the JQ-1-treated group. The livers  
298 obtained from mice in the JQ-1-treated group were lighter and more vivid in color, and  
299 the surface was relatively smooth compared with the livers from mice in the control  
300 group. Hematoxylin and eosin staining of the liver showed that the percentage of the  
301 area of the liver that had granulomas in the JQ-1-treated group was significantly  
302 reduced compared with that in the HP- $\beta$ -CD control group (Fig 6C) ( $P < 0.05$ ). In  
303 addition, the weights of the liver and spleen obtained from mice treated with JQ-1 were  
304 significantly lower than those from control mice (Fig 6D). Moreover, the results of the  
305 AST and ALT assays showed that the activity of serum transaminase in the JQ-1-  
306 treated group was significantly lower than that in the control group (Fig 6F) ( $P < 0.05$ ).

307 **Fig 6. Effect of JQ-1 treatment on liver granuloma in mice infected with *S.***  
308 ***japonicum*.** (A) Protocol used to assess liver granuloma in mice. (B) Gross appearance  
309 of livers obtained from mice infected with *S. japonicum* and treated with JQ-1 or vehicle  
310 (HP- $\beta$ -CD). Liver slices stained with hematoxylin and eosin. Scale bars: 500  $\mu$ m. (C)  
311 Measurement of granuloma area as a percentage of total area as assessed by computer-  
312 aided morphometry. (D) Liver weight of *S. japonicum*-infected mice treated with JQ-  
313 1 or HP- $\beta$ -CD. (E) Spleen weight of *S. japonicum*-infected mice treated with JQ-1 or

314 HP- $\beta$ -CD. (F) Effect of JQ-1 treatment on serum alanine aminotransferase (ALT) and  
315 aspartate aminotransferase (AST) in mice infected with *S. japonicum*. Data represent  
316 the mean  $\pm$  SEM (n = 9 for each group). Asterisks denote statistically significant  
317 differences (Student's t-test, \* $P$  < 0.05; \*\*\* $P$  < 0.001) vs. the HP- $\beta$ -CD-treated control  
318 group. ns, not significant.

319 To further explore the effect of JQ-1 treatment to ameliorate hepatic granuloma in mice  
320 infected with *S. japonicum*, we used quantitative PCR to detect the expression levels of  
321 a series of inflammatory factors. The mRNA expression levels of the genes in the HP-  
322  $\beta$ -CD-treated control group were set at 1. As shown in Fig 7, the mRNA expression  
323 levels of the inflammatory factors in the JQ-1-treated group relative to those in the  
324 control group were significantly decreased ( $P$  < 0.05). Notably, the expression level of  
325 interleukin 13 (IL-13), an inflammatory factor closely related to the formation of  
326 granuloma caused by *S. japonicum*, was significantly reduced.

327 **Fig 7. Effect of JQ-1 treatment on mRNA expression of inflammatory-related**  
328 **genes in the liver of mice infected with *S. japonicum*.** The mRNA levels are expressed  
329 relative to those in controls following normalization with GAPDH. Data represent the  
330 mean  $\pm$  SEM (n = 9 for each group). Asterisks denote statistically significant  
331 differences (Student's t test, \* $P$  < 0.05).

332 **Effects of JQ-1 treatment on schistosome eggs in the liver and**  
333 **on adult worms in mice infected with *S. japonicum***



334 The above results suggested that JQ-1 alleviated liver injury caused by schistosome  
335 infection to some extent and reduced the formation of hepatic granuloma in mice. To  
336 observe whether JQ-1 affected *S. japonicum* eggs in the liver, we evaluated the quantity  
337 of eggs in the liver of mice in the JQ-1–treated group compared with that in the HP- $\beta$ -  
338 CD–treated control group after schistosome infection. The liver tissue obtained  
339 following digestion with 10% potassium hydroxide was used to observe the  
340 morphology of the eggs and to count them. We found that the proportion of abnormally  
341 small or dead eggs was increased in the JQ-1–treated group (Fig 8). The volume of eggs  
342 in the liver of JQ-1–treated infected mice was approximately 40% lower than that of  
343 control mice injected with HP- $\beta$ -CD. By contrast, the numbers of adult worms and  
344 worm pairs in the livers of the JQ-1–treated group were not affected. The percentage of  
345 the liver that was granuloma tissue in the JQ-1–treated group was significantly  
346 decreased compared with control. Although this effect in the treated group may have  
347 been due to the significant decrease in the number of eggs or to the increase in the  
348 number of small or dead eggs, it may also be related to the immune regulation of JQ-1  
349 in mice. We used an EdU-incorporation assay to assess the proliferation of germ cells  
350 in schistosomes of infected mice (Fig 8). Although some differences between the  
351 control group and the treated group were observed, the differences were not as obvious  
352 as those observed in the in vitro experiments.

353 **Fig 8. JQ-1 treatment alters germ cell proliferation of *S. japonicum* and egg**  
354 **production in the liver of mice infected with *S. japonicum*.** (A) Egg morphology and  
355 (B) production in the liver. (C) Numbers of adult worms and (D) worm pairs in the

356 liver. Red signals indicate active mitotic cells labeled by EdU; blue, Hoechst-positive  
357 cells. EdU-incorporated cells in control worms were detected in the testes and  
358 parenchyma of males (E) and in the vitellarium and ovary of females (F). (G, H) EdU-  
359 positive cells detected in *S. japonicum* of mice treated with JQ-1. (A) Scale bars: 500  
360  $\mu\text{m}$ . (E-H) Scale bars: 100  $\mu\text{m}$ . Data represent the mean  $\pm$  SEM ( $n = 9$  for each group).  
361 Asterisks denote statistically significant differences (Student's t test, \*\*  $P < 0.01$ ).

362 CLSM analyses of the JQ-1-treated group revealed morphologic abnormalities in the  
363 gonads of both sexes. In the control HP- $\beta$ -CD-treated group, no morphological  
364 anomalies were observed in the ovaries of the females (Fig 9A) or the testes of the  
365 males (Fig 10B). By contrast, compared with the control group, the number of  
366 spermatozoa in the seminal vesicles of schistosomes in the JQ-1-treated group was  
367 reduced and the development of spermatozoa was impaired (Fig 9C, F). In addition, the  
368 overall morphology of the germ cells of schistosomes in both the testis and ovary were  
369 markedly changed. The sizes of the primary oocytes and immature oocytes were  
370 reduced, and the cells in the JQ-1-treated group were not as filled as the cells in the  
371 HP- $\beta$ -CD group (Fig 9A, D). Moreover, large pore-like structures could be found in the  
372 testes and ovaries of male and female schistosomes, respectively, in the JQ-1-treated  
373 group (Fig 10, arrows).

374 **Fig 9. Morphological changes in the testis and ovary of *S. japonicum* treated with**  
375 **JQ-1 in vivo.** Worms were stained with carmine hydrochloride and analyzed using  
376 confocal laser scanning microscopy. (A–C) Testes and seminal vesicles of worms in

377 control mice. (D–F) Testes and seminal vesicles of worms in mice treated with JQ-1.

378 Abbreviations: ov, ovary; t, testes; SV, seminal vesicles. Scale bars: 20  $\mu$ m.

## 379 **Discussion**

380 The present study assessed the effects of JQ-1 application on *S. japonicum* in vitro  
381 and in vivo and investigated the potential mechanisms undergirding the observed  
382 effects. The results of our in vitro studies indicated that although JQ-1 application did  
383 not affect the number or pairing of adult schistosomes, the number of eggs decreased  
384 in a concentration-dependent manner. In addition, mitotic activity in the somatic and  
385 germ cells of the adult worms decreased. The numbers of spermatogonia and  
386 spermatocytes were significantly decreased and the testicular lobes were significantly  
387 smaller in male schistosomes treated with JQ-1 compared with schistosomes in the  
388 control group. Moreover, large pore-like structures were observed in the testes and  
389 ovaries of JQ-1-treated schistosomes. These results suggested that JQ-1 specifically  
390 inhibited the proliferation of germ cells. Our EdU incorporation assays confirmed that  
391 JQ-1 reduced the number of proliferating cells in both the ovaries and testes of  
392 schistosomes. Proliferation of those cells is essential for the initiation and continuous  
393 production of mature germ cells. Treatment with JQ-1 also decreased the expression  
394 levels of two genes related to schistosome reproduction, *SjPlk1* and *SjNanos1*, in a  
395 concentration-dependent manner. Thus, this study is the first, to our knowledge, to  
396 show that JQ-1 is effective against reproductive development and egg production of  
397 adult *S. japonicum* in vitro. In schistosomiasis in humans, morbidity is mainly attributed  
398 to the eggs because of the granulomatous inflammatory reaction caused by the host

399 immune response to egg antigens [2-3]. Thus, we assessed the ability of JQ-1 to treat  
400 hepatic granuloma in mice infected with *S. japonicum* in vivo. JQ-1 treatment  
401 significantly decreased the percentage of the area of the liver with granulomas, the  
402 activity of liver serum transaminase, and schistosome egg production in the liver of  
403 mice without affecting the survival of adult worms. The attenuated egg production was  
404 accompanied by decreased expression levels of proinflammatory cytokines, which may  
405 have contributed to the amelioration of hepatic granuloma. Taken together, our findings  
406 provide evidence supporting the development of JQ-1 as an anti-schistosomal agent.

407 The BET family proteins are characterized by the presence of two tandem  
408 bromodomains and an extra-terminal domain, which are found in BRD2, BRD3, BRD4,  
409 and BRDT in mammals [6]. The domain organization of mammalian BET proteins  
410 is conserved in orthologs, including in *Drosophila* FSH and *Saccharomyces cerevisiae*  
411 Bdf1 and Bdf2. Bromodomains that specifically bind acetylated lysine residues in  
412 histones serve as chromatin-targeting modules that decipher the histone acetylation  
413 code. BET proteins play a crucial role in regulating gene transcription through  
414 epigenetic interactions between bromodomains and acetylated histones during cell  
415 proliferation and differentiation [10-11]. *Brd2* mRNA is expressed in distinct patterns  
416 during ovarian folliculogenesis, which is essential for embryonic development in the  
417 mouse [12-13], *Brdt* acetylated histone H4-dependent chromatin remodeling in  
418 mammalian spermiogenesis is essential for male germ cell differentiation [14-15]. In  
419 addition, a BRDT-like function in *Drosophila* plays crucial roles in spermatid  
420 differentiation [16]. Epigenetic modifications, including DNA methylation, histone

421 modifications, and non-coding RNAs, play important roles in the development and  
422 reproduction of schistosomes [17]. SmGCN5 and SmCBP1 are two histone  
423 acetyltransferases of *S. mansoni*, the knockdown of SmGCN5 or SmCBP1 significantly  
424 inhibited Smp14 expression, which compromised the reproductive system of mature  
425 females, egg-laying and egg morphology [18]. Sirtuins are a family of histone  
426 deacetylases, and sirtuin inhibitors can inhibit apoptosis and death in schistosome  
427 larvae, the disruption of adult worm pairs, inhibition of egg laying and damage to the  
428 male and female worm reproductive systems [19-20].

429 As a first-in-class potent and selective inhibitor of the BET signaling pathway, JQ-1  
430 has been widely used in biology studies. The results of some of those many studies  
431 indicate that JQ-1 interacts with the BRD pocket in a manner competitive with  
432 acetylated peptide binding, resulting in the displacement of BET proteins from  
433 acetylated chromatin in cells exposed to these inhibitors along with their associated  
434 transcript initiation and elongation factors. JQ-1 has also been used as a  
435 pharmacological tool for elucidating the roles and functions of BET in mammals.  
436 However, little is known about the effect of JQ-1 on parasites.

437 Nanos has been described as a necessary factor in the differentiation and migration  
438 of primordial germ cells, which play an essential role in the proliferation of germ cells  
439 in schistosomes [21-22]. SmPlk1 regulates the cell cycle G2/M transition in *Xenopus*  
440 oocytes, which is important for cell-cycle progression in the gonadal cells of  
441 *Schistosoma* [23-24]. In the present study, we investigated whether JQ-1 also affected  
442 the transcript level of *Nanos1* and *Plk1*. Indeed, treatment with JQ-1 significantly

443 reduced the transcript level of both these genes in male and female worms, which likely  
444 affected the proliferation of the gonadal cells in *Schistosoma*.

445 This study has limitations that should be considered when interpreting our results.  
446 On the basis of previous publications [25-26], we used only a single dose of JQ-1 (50  
447 mg/kg) to treat mice infected with *S. japonicum* for 15 days. Thus, we were unable to  
448 make any comparisons of the effects after various treatment times or dosage on  
449 parasites in infected mice. Future studies are needed to find the therapeutic optimum  
450 dosage.

451 In conclusion, our data showed that JQ-1 treatment ameliorated *S. japonicum* egg-  
452 induced hepatic granuloma, which may be due in part to suppressing the development  
453 of both the male and female reproductive systems and female egg production in this  
454 parasite. Our findings provide theoretical and practical evidence supporting the  
455 development of JQ-1 as an anti-schistosomal agent.

## 456 **References**

- 457 1. LoVerde PT. Schistosomiasis. *Adv Exp Med Biol.* 2019; 1154:45-70. doi:  
458 10.1007/978-3-030-18616-6\_3. PMID: 31297759.
- 459 2. McManus DP, Dunne DW, Sacko M, Utzinger J, Vennervald BJ, Zhou XN.  
460 Schistosomiasis. *Nat Rev Dis Primers.* 2018; 4(1):13. doi: 10.1038/s41572-018-  
461 0013-8. PMID: 30093684.
- 462 3. Colley DG, Bustinduy AL, Secor WE, King CH. Human schistosomiasis. *Lancet.*  
463 2014; 383(9936):2253-64. doi: 10.1016/S0140-6736(13)61949-2 .  
464 PMID: 24698483. PMCID: PMC4672382.

- 465 4. Melman SD, Steinauer ML, Cunningham C, Kubatko LS, Mwangi IN, Wynn NB,  
466 et al. Reduced susceptibility to praziquantel among naturally occurring Kenyan  
467 isolates of *Schistosoma mansoni*. *PLoS Negl Trop Dis*. 2009, 3(8): 504.  
468 doi: 10.1371/journal.pntd.0000504 . PMID: 19688043. PMCID: PMC2721635.
- 469 5. Kasinathan RS, Greenberg RM. Pharmacology and potential physiological  
470 significance of schistosome multidrug resistance transporters. *Exp Parasitol*, 2012,  
471 132(1): 2-6. doi: 10.1016/j.exppara.2011.03.004. PMID: 21420955.  
472 PMCID: PMC3154572.
- 473 6. Taniguchi Y. The Bromodomain and Extra-Terminal Domain (BET) Family:  
474 Functional Anatomy of BET Paralogous Proteins. *Int J Mol Sci*, 2016, 17(11):  
475 E1849. doi: 10.3390/ijms17111849. PMID: 27827996. PMCID: PMC5133849.
- 476 7. Ferri E, Petosa C, McKenna CE. Bromodomains: Structure, function and  
477 pharmacology of inhibition. *Biochem Pharmacol*. 2016 Apr 15;106:1-18. doi:  
478 10.1016/j.bcp.2015.12.005. Epub 2015 Dec 18. PMID: 26707800.
- 479 8. Liu S, Cai P, Hou N, Piao X, Wang H, Hung T, et al. Genome-wide identification  
480 and characterization of a panel of house-keeping genes in *Schistosoma japonicum*.  
481 *Mol Biochem Parasitol*. 2012 Mar-Apr;182(1-2):75-82. doi:  
482 10.1016/j.molbiopara.2011.12.007. Epub 2012 Jan 8. PMID: 22245333.
- 483 9. Liu F, Ding H, Tian J, Zhou C, Yang F, Shao W, et al. Differential gene expression,  
484 including Sjfs800, in *Schistosoma japonicum* females at pre-pairing, initial pairing  
485 and oviposition. *Parasit Vectors*. 2019 Aug 23;12(1):414. doi: 10.1186/s13071-019-  
486 3672-8. PMID: 31443730; PMCID: PMC6708146

- 487 10. Doroshov DB, Eder JP, LoRusso PM. BET inhibitors: a novel epigenetic approach.  
488 Ann Oncol. 2017 Aug 1;28(8):1776-1787. doi:10.1093/annonc/mdx157. PMID:  
489 28838216.
- 490 11. Cheung KL, Kim C, Zhou MM. The Functions of BET Proteins in Gene  
491 Transcription of Biology and Diseases. Front Mol Biosci. 2021 Sep 3; 8:728777.  
492 doi: 10.3389/fmolb.2021.728777. PMID: 34540900; PMCID: PMC8446420.
- 493 12. Trousdale RK, Wolgemuth DJ. Bromodomain containing 2 (Brd2) is expressed in  
494 distinct patterns during ovarian folliculogenesis independent of FSH or GDF9  
495 action. Mol Reprod Dev, 2004, (3):261-268. doi: 10.1002/mrd.20059.  
496 PMID: 15112318.
- 497 13. Shang E, Wang X, Wen D, Greenberg DA, Wolgemuth DJ. Double bromodomain-  
498 containing gene Brd2 is essential for embryonic development in mouse. Dev Dyn,  
499 2009, 238(4): 908-917. doi: 10.1002/dvdy.21911. PMID: 19301389.  
500 PMCID: PMC2771124.
- 501 14. Berkovits BD, Wolgemuth DJ. The first bromodomain of the testis-specific double  
502 bromodomain protein Brdt is required for chromocenter organization that is  
503 modulated by genetic background. Developmental Biolog, 2011, 360(2): 358-368.  
504 doi: 10.1016/j.ydbio.2011.10.005. PMID: 22020252. PMCID: PMC3217133.
- 505 15. Matzuk MM1, McKeown MR, Filippakopoulos P, Li Q, Ma L, Agno JE, et al.  
506 Small-molecule inhibition of BRDT for male contraception. Cell, 2012, 150(4):  
507 673-684. doi: 10.1016/j.cell.2012.06.045. PMID: 22901802.  
508 PMCID: PMC3420011.



- 509 16. Kimura S, Loppin B. Two bromodomain proteins functionally interact to  
510 recapitulate an essential BRDT-like function in *Drosophila* spermatocytes. *Open*  
511 *Biol.* 2015, 5(2): 140145. doi: 10.1098/rsob.140145. PMID: 25652540.  
512 PMID: PMC4345279.
- 513 17. Liu W. Epigenetics in Schistosomes: What We Know and What We Need Know.  
514 *Front Cell Infect Microbiol.* 2016 Nov 11; 6:149. doi: 10.3389/fcimb.2016.00149.  
515 PMID: 27891322; PMID: PMC5104962
- 516 18. Carneiro VC, de Abreu da Silva IC, Torres EJ, Caby S, Lancelot J, Vanderstraete  
517 M, et al. Epigenetic changes modulate schistosome egg formation and are a novel  
518 target for reducing transmission of schistosomiasis. *PLoS Pathog.* 2014 May  
519 8;10(5): e1004116. doi: 10.1371/journal.ppat.1004116. PMID: 24809504; PMID:  
520 PMC4014452.
- 521 19. Lancelot J, Caby S, Dubois-Abdesselem F, Vanderstraete M, Trolet J, Oliveira G,  
522 et al. *Schistosoma mansoni* Sirtuins: characterization and potential as  
523 chemotherapeutic targets. *PLoS Negl Trop Dis.* 2013 Sep 12;7(9): e2428.  
524 doi:10.1371/journal.pntd.0002428. PMID: 24069483; PMID: PMC3772001.
- 525 20. Lancelot J, Cabezas-Cruz A, Caby S, Marek M, Schultz J, Romier C, et al.  
526 Schistosome sirtuins as drug targets. *Future Med Chem.* 2015;7(6):765-82. doi:  
527 10.4155/fmc.15.24. PMID: 25996069.
- 528 21. Liu Q, Zhu L, Liu F, Hua M, Ding H, He S, et al. Function of *Nanos1* gene in the  
529 development of reproductive organs of *Schistosoma japonicum*. *Parasitol Res.*  
530 2017 May;116(5):1505-1513. doi: 10.1007/s00436-017-5427-9. Epub 2017 Mar

- 531 28. PMID: 28352943.
- 532 22. Kellershohn J, Thomas L, Hahnel SR, Grünweller A, Hartmann RK, Hardt M, et  
533 al. Insects in anthelmintics research: Lady beetle-derived harmonine affects  
534 survival, reproduction and stem cell proliferation of *Schistosoma mansoni*. PLoS  
535 Negl Trop Dis. 2019 Mar 14;13(3):e0007240. doi: 10.1371/journal.pntd.0007240.  
536 PMID: 30870428; PMCID: PMC6436750.
- 537 23. Long T, Neitz RJ, Beasley R, Kalyanaraman C, Suzuki BM, Jacobson MP, et al.  
538 Structure-Bioactivity Relationship for Benzimidazole Thiophene Inhibitors of  
539 Polo-Like Kinase 1 (PLK1), a Potential Drug Target in *Schistosoma mansoni*.  
540 PLoS Negl Trop Dis. 2016 Jan 11;10(1):e0004356. doi:  
541 10.1371/journal.pntd.0004356. PMID: 26751972; PMCID: PMC4709140.
- 542 24. Long T, Vanderstraete M, Cailliau K, Morel M, Lescuyer A, Gouignard N, et al.  
543 SmSak, the second Polo-like kinase of the helminth parasite *Schistosoma mansoni*:  
544 conserved and unexpected roles in meiosis. PLoS One. 2012;7(6):e40045. doi:  
545 10.1371/journal.pone.0040045. Epub 2012 Jun 29. PMID: 22768216; PMCID:  
546 PMC3386946.
- 547 25. Ding N, Hah N, Yu RT, Sherman MH, Benner C, Leblanc M, et al. BRD4 is a  
548 novel therapeutic target for liver fibrosis. Proc Natl Acad Sci U S A. 2015 Dec  
549 22;112(51):15713-8. doi: 10.1073/pnas.1522163112. Epub 2015 Dec 7. PMID:  
550 26644586; PMCID: PMC4697417.
- 551 26. Filippakopoulos P, Qi J, Picaud S, Shen Y, Smith WB, Fedorov O, et al. Selective  
552 inhibition of BET bromodomains. Nature. 2010 Dec 23;468(7327):1067-73. doi:

553 10.1038/nature09504. Epub 2010 Sep 24. PMID: 20871596; PMCID:

554 PMC3010259.

555

## 556 **Acknowledgments**

557 We thank a native English speaker (Science/Medical English Editing for International

558 Researchers) for modifying the manuscript.

559

## 560 **Funding Statement**

561 This work was supported by grants from the National Natural Science Foundation of

562 China (<http://www.nsf.gov.cn>) (grant numbers 81271865) and Key University Science

563 Research Project of Anhui Province of China (KJ2019A0223). The funders had no role

564 in study design, data collection and analysis, decision to publish, or preparation of the

565 manuscript.

566

## 567 **Data Availability**

568 All relevant data are within the manuscript and its Supporting Information files.

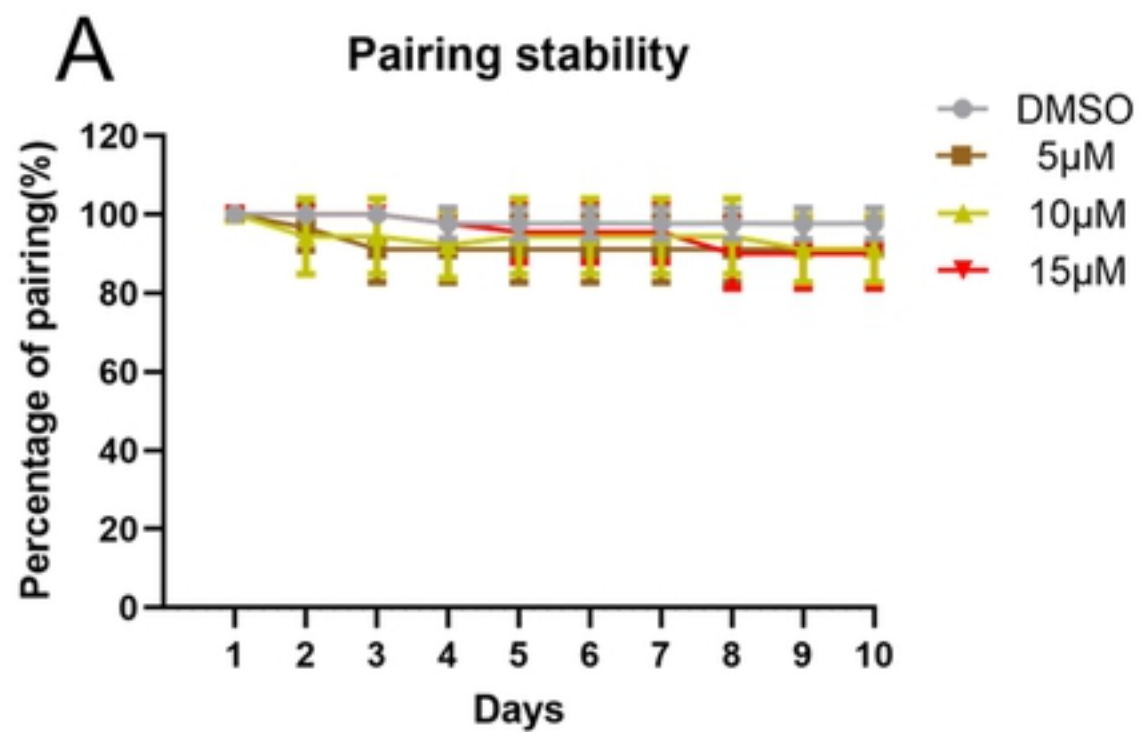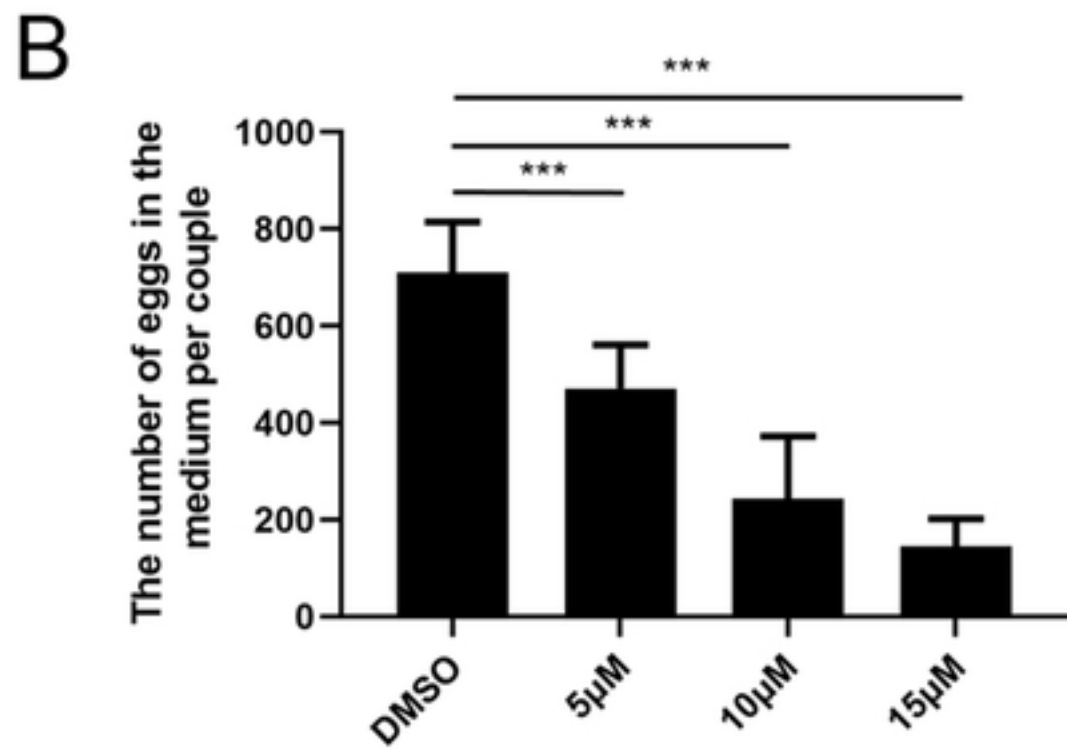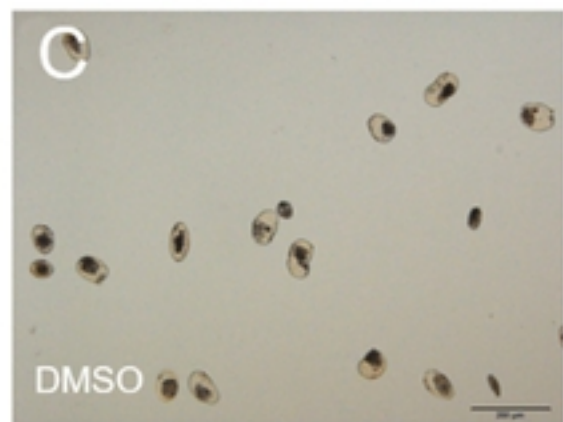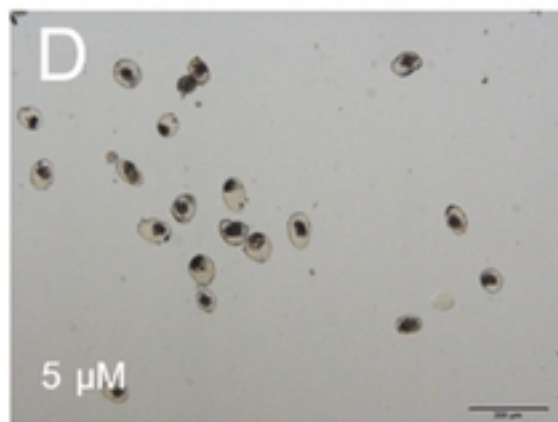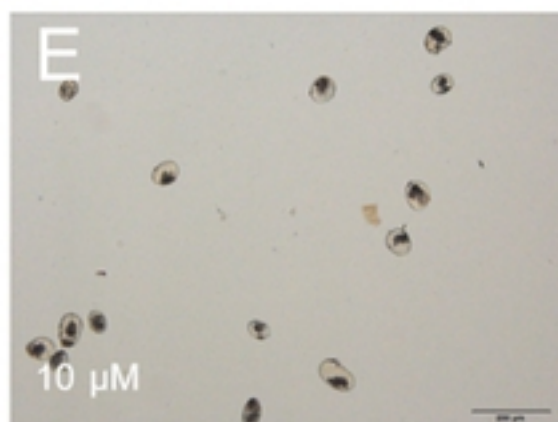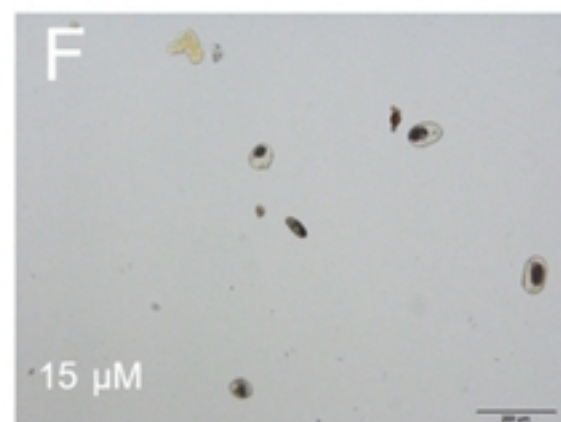

Figure.1

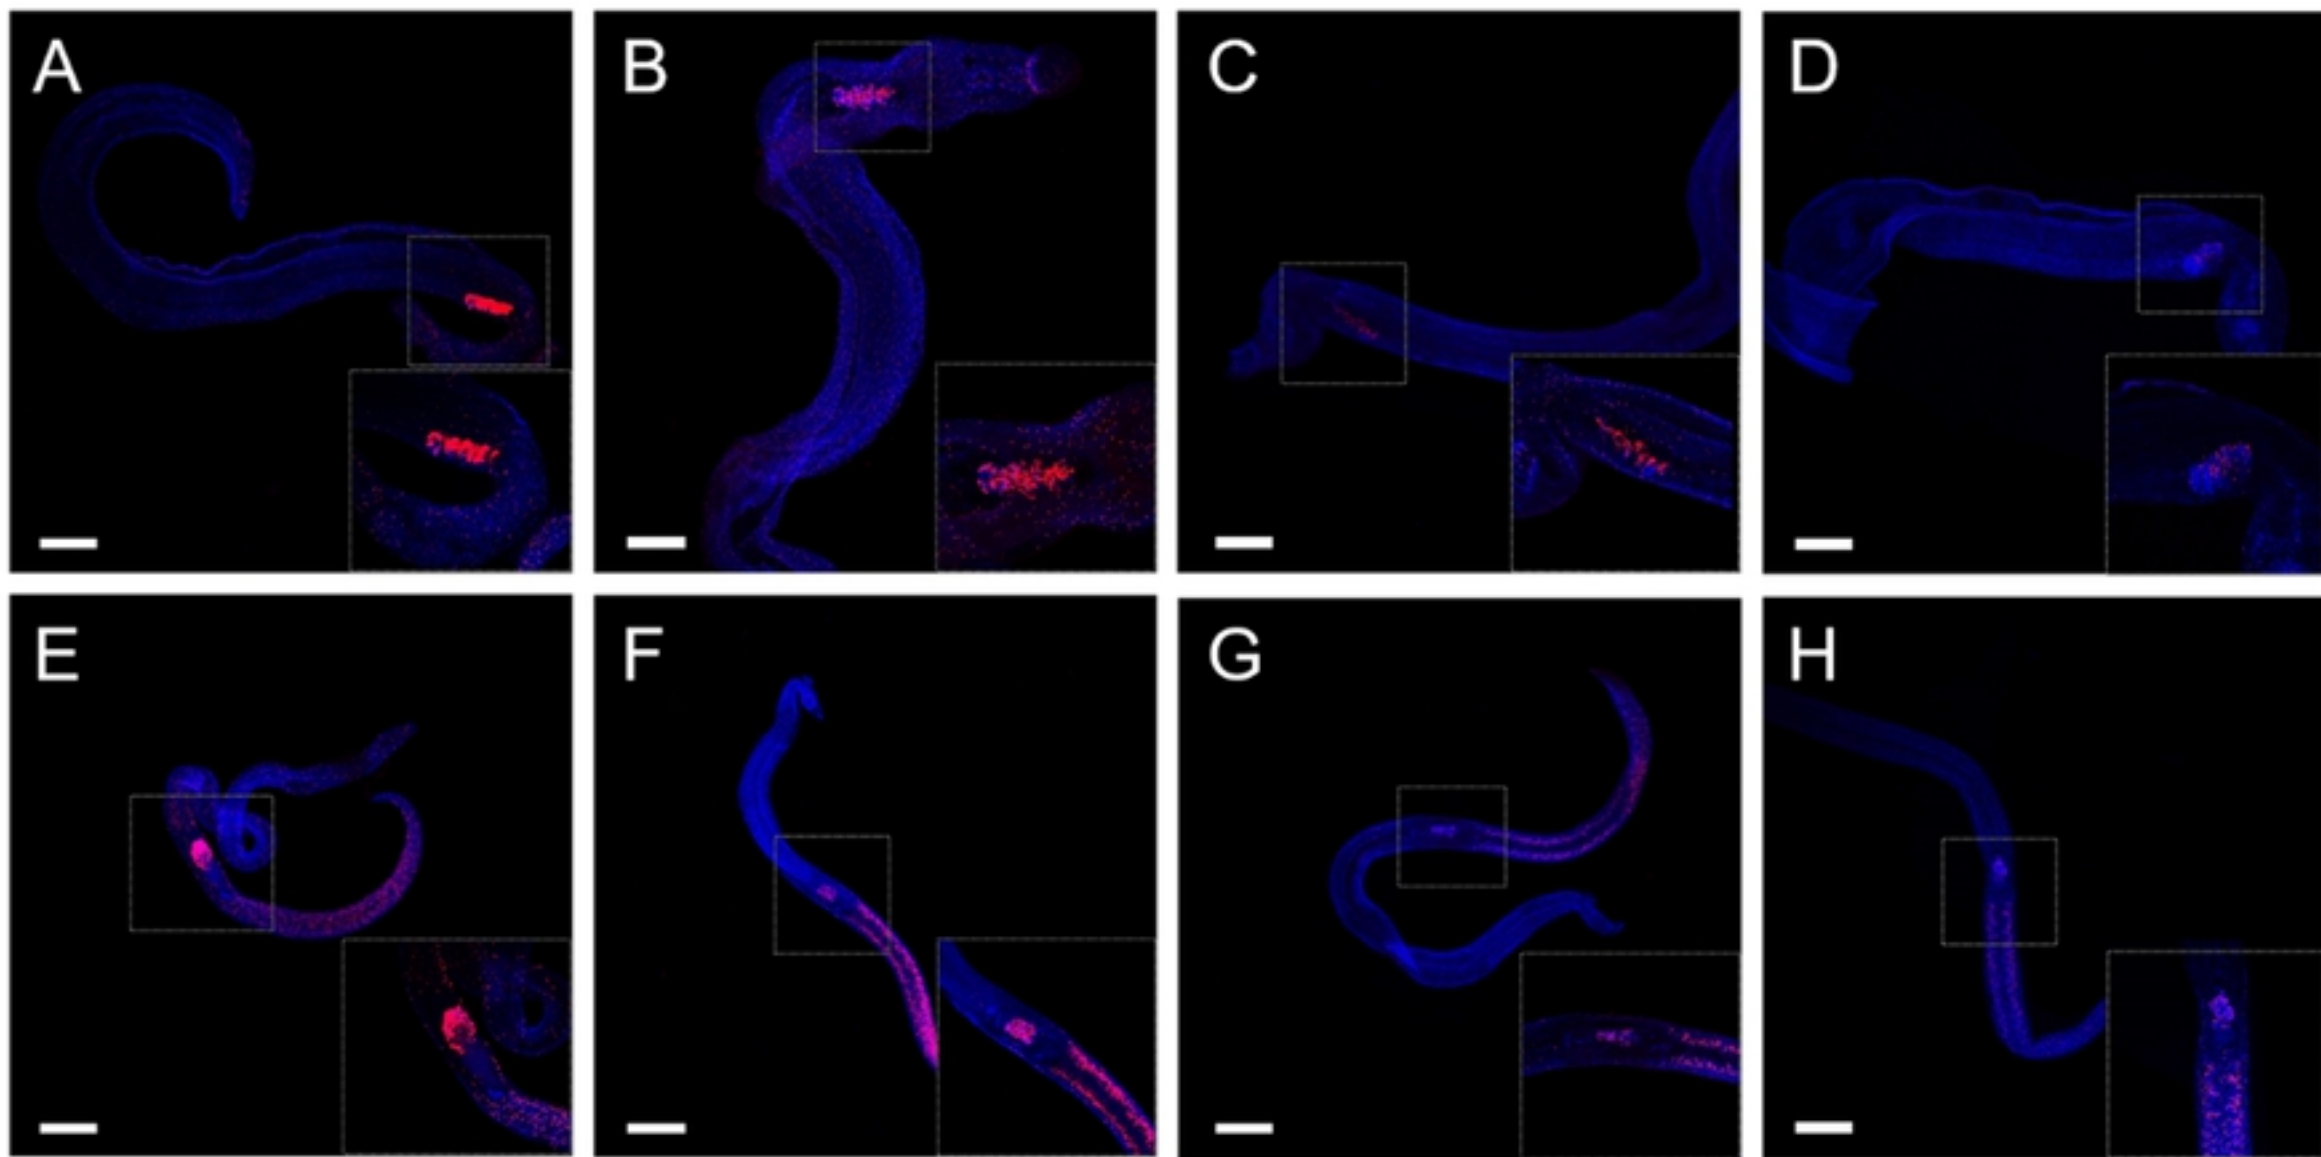

Figure.2

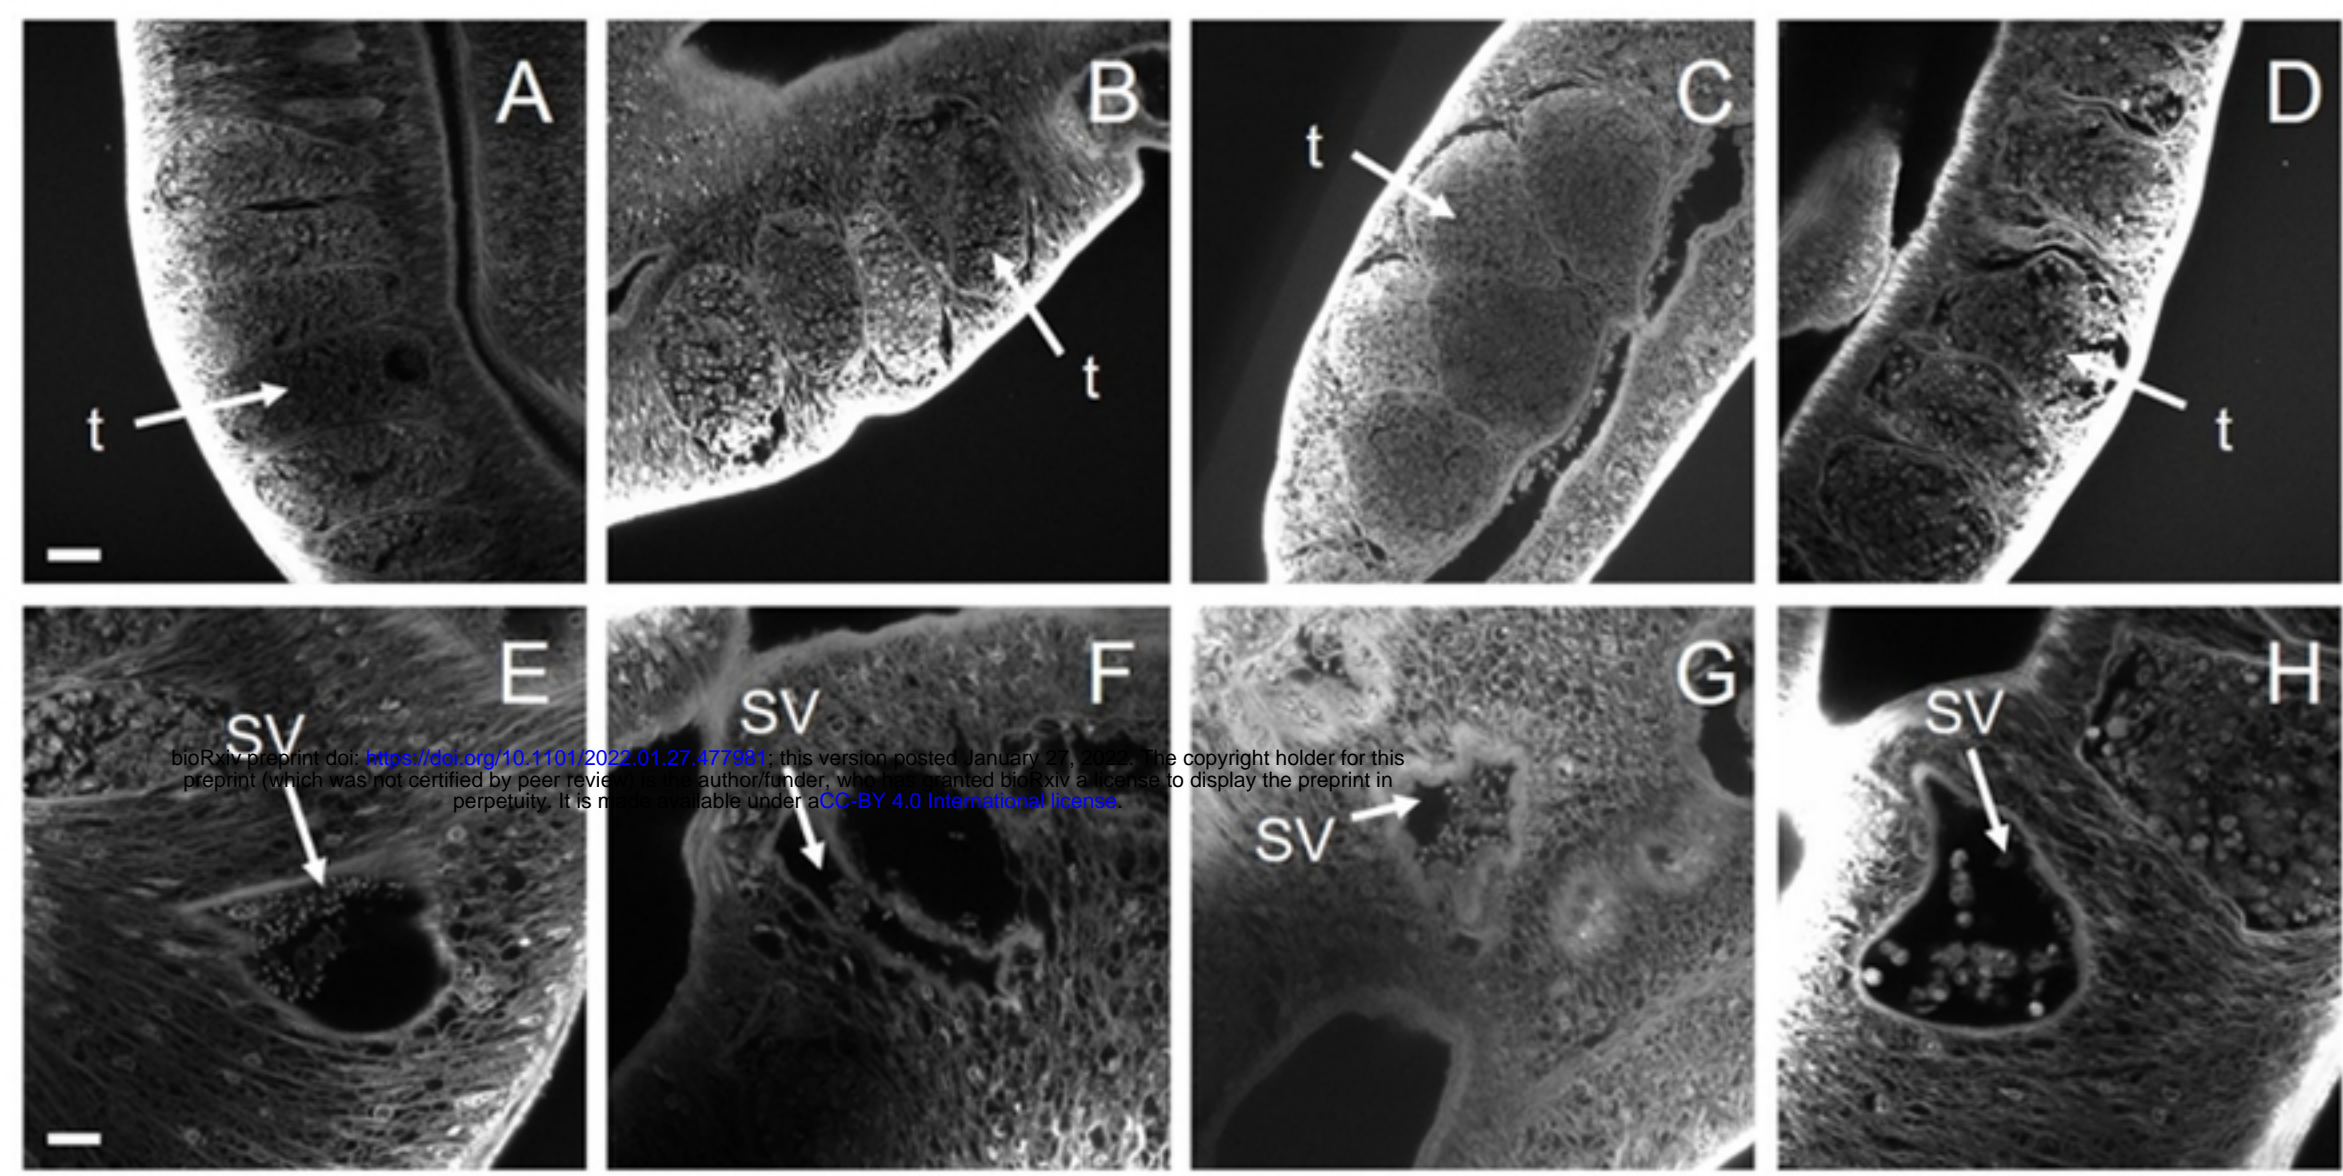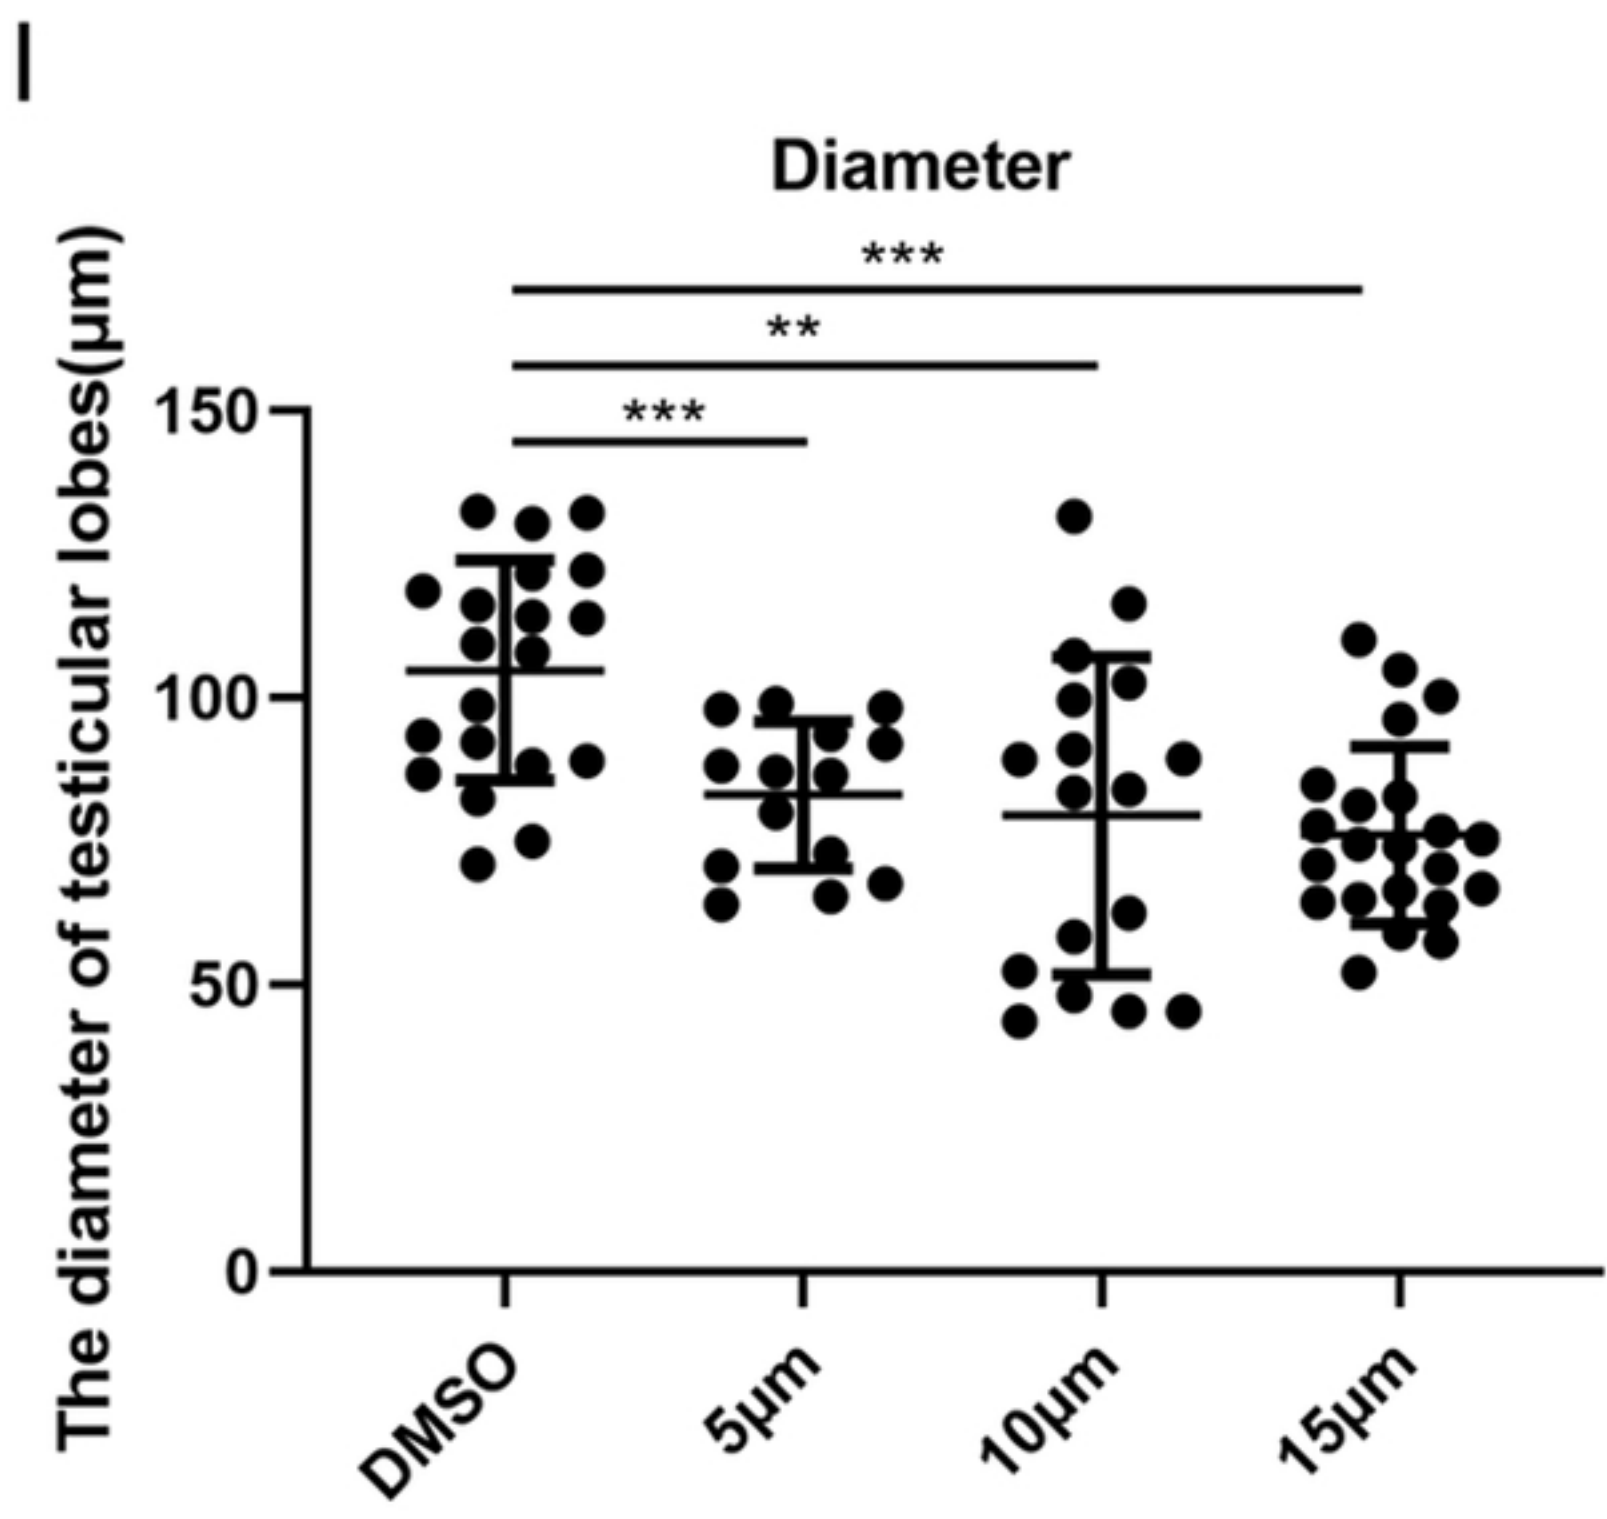

Figure.3

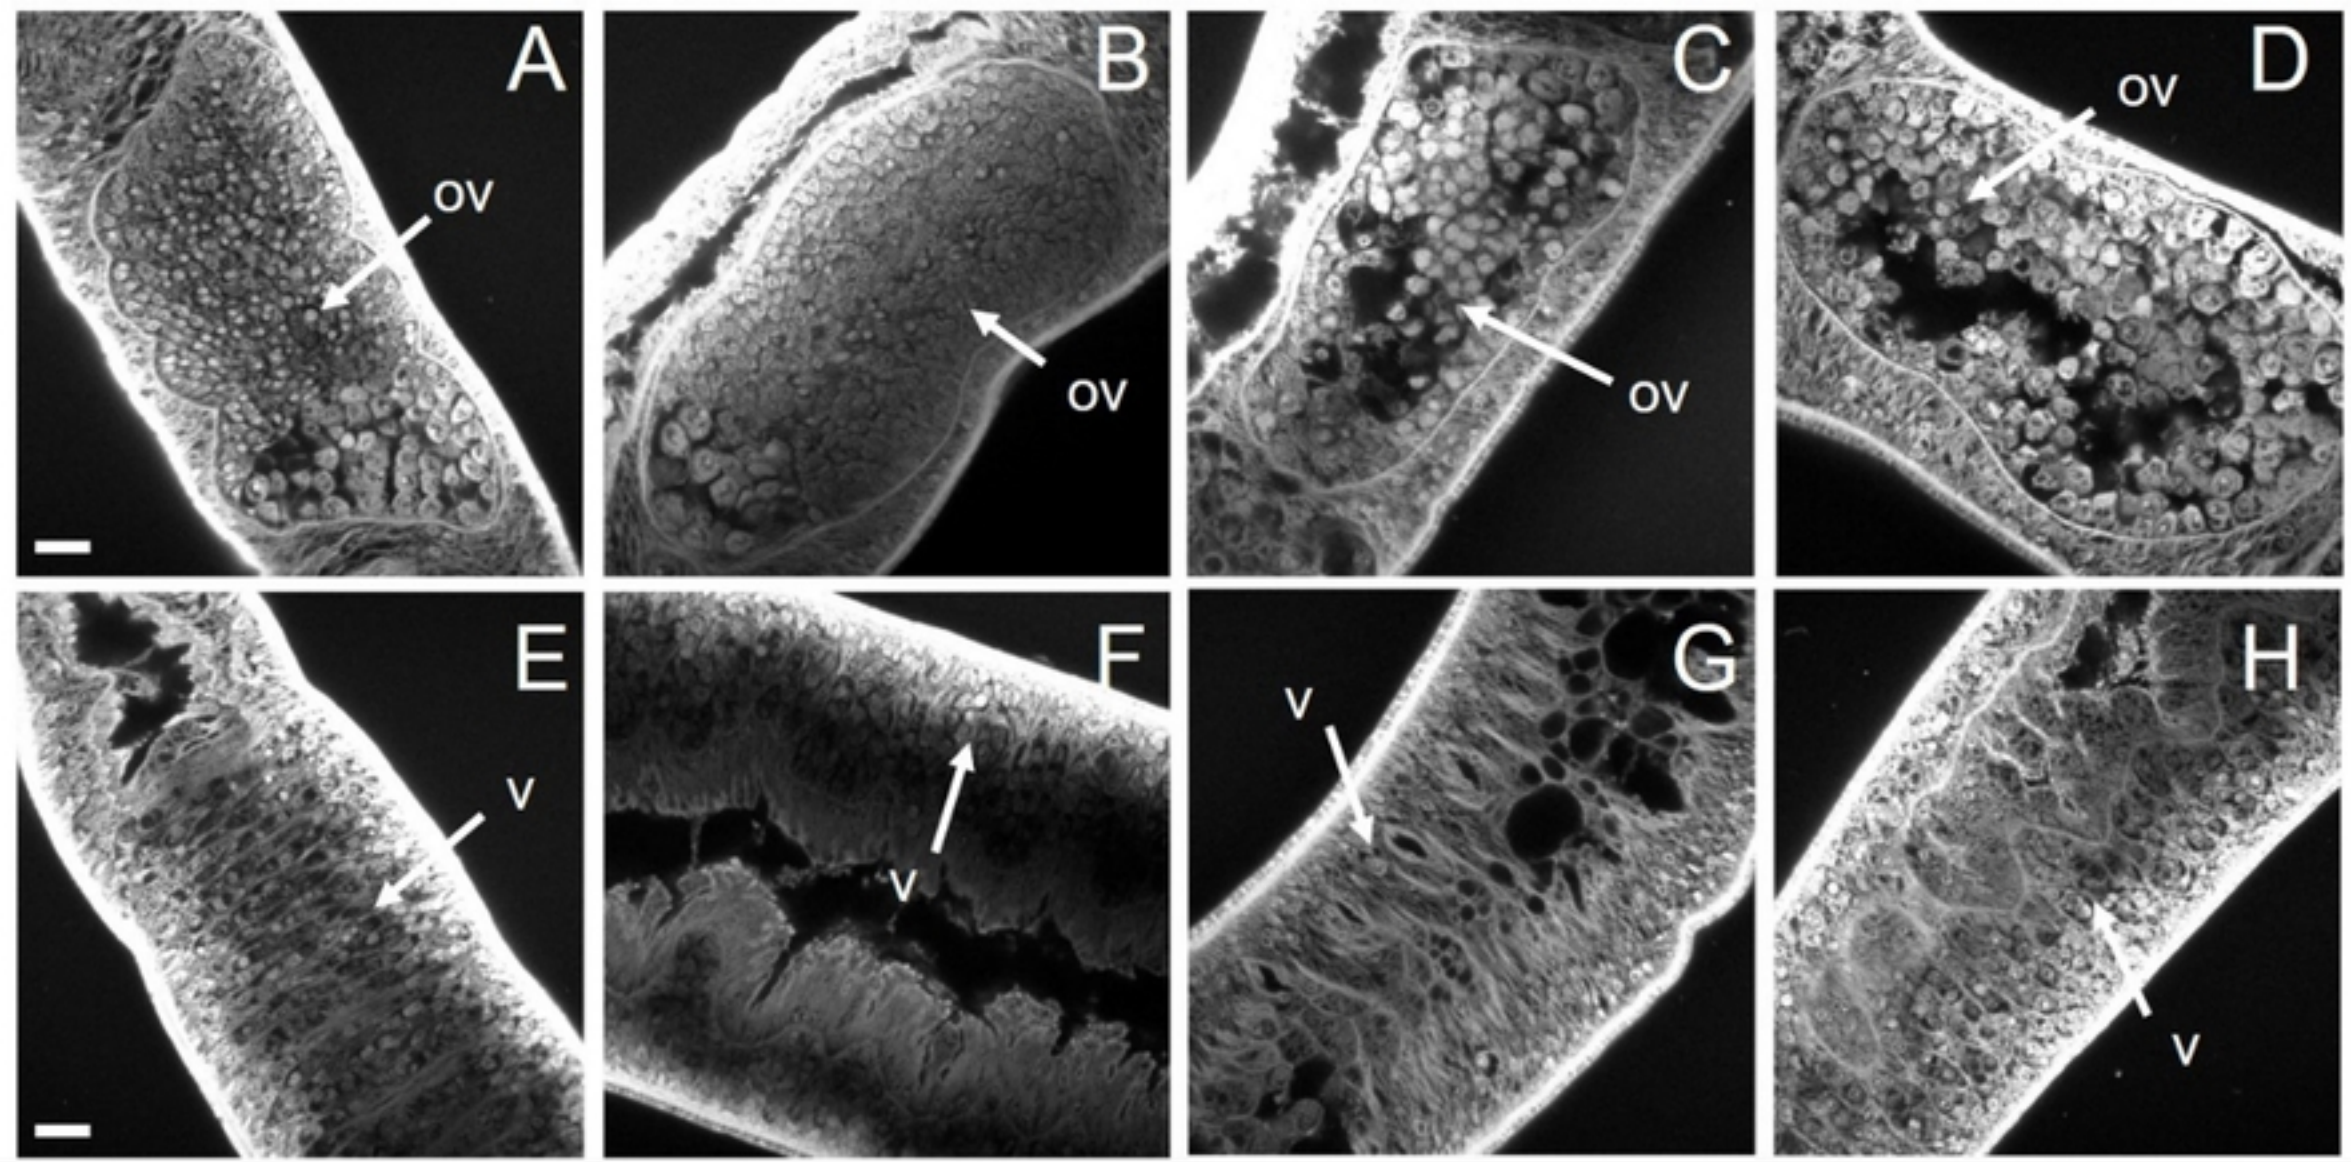

Figure.4

**A**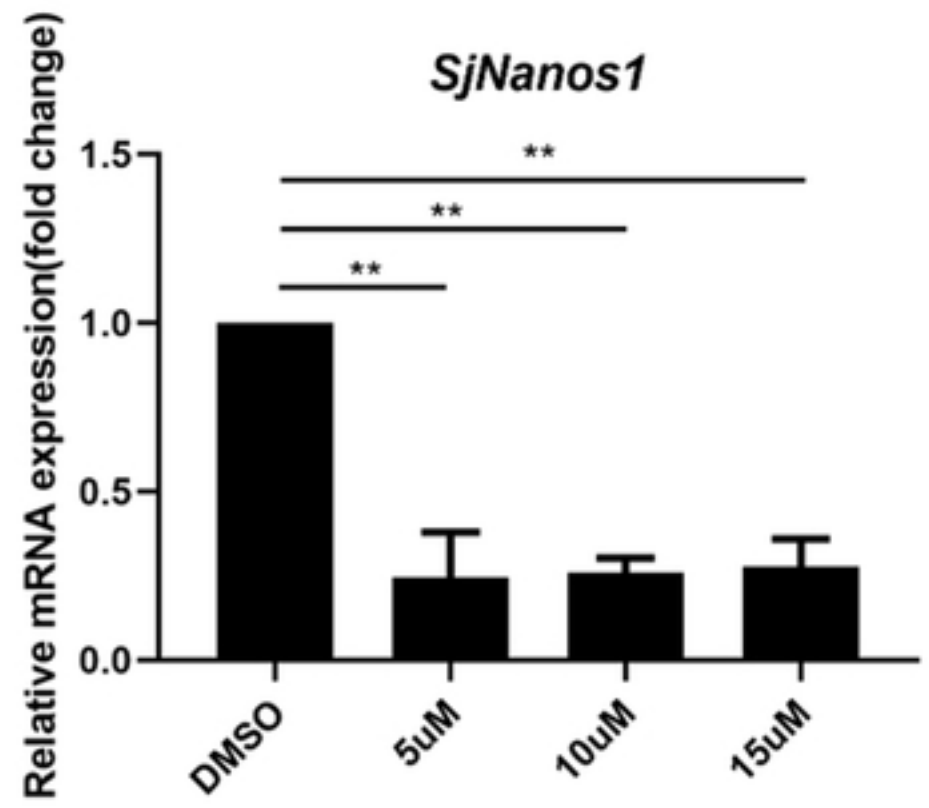**B**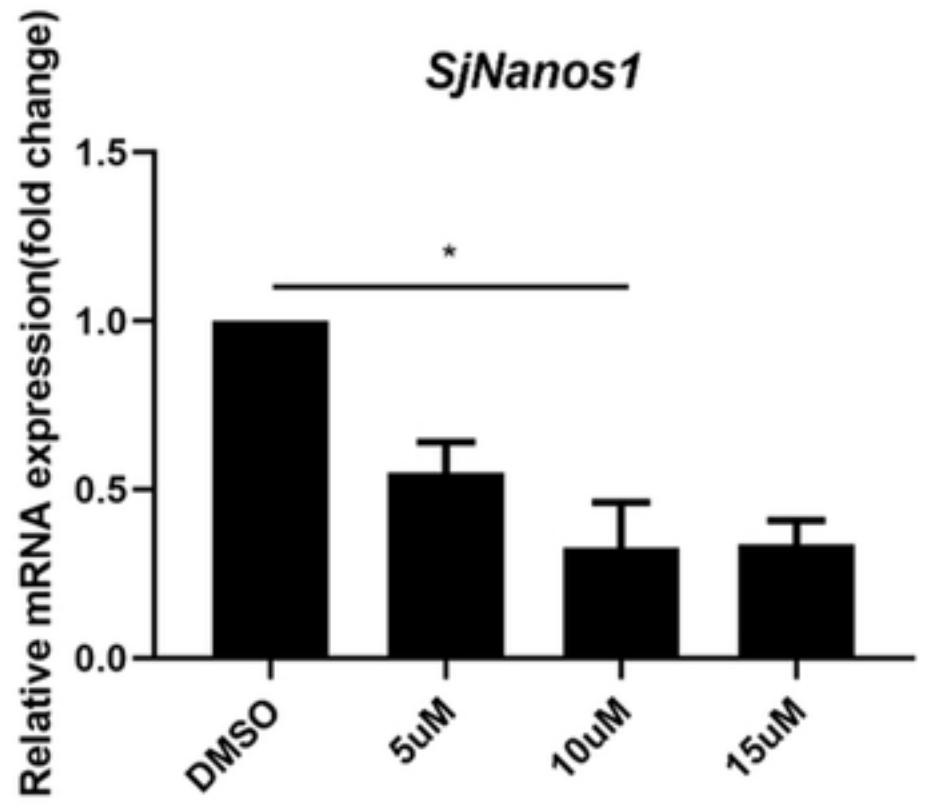**C**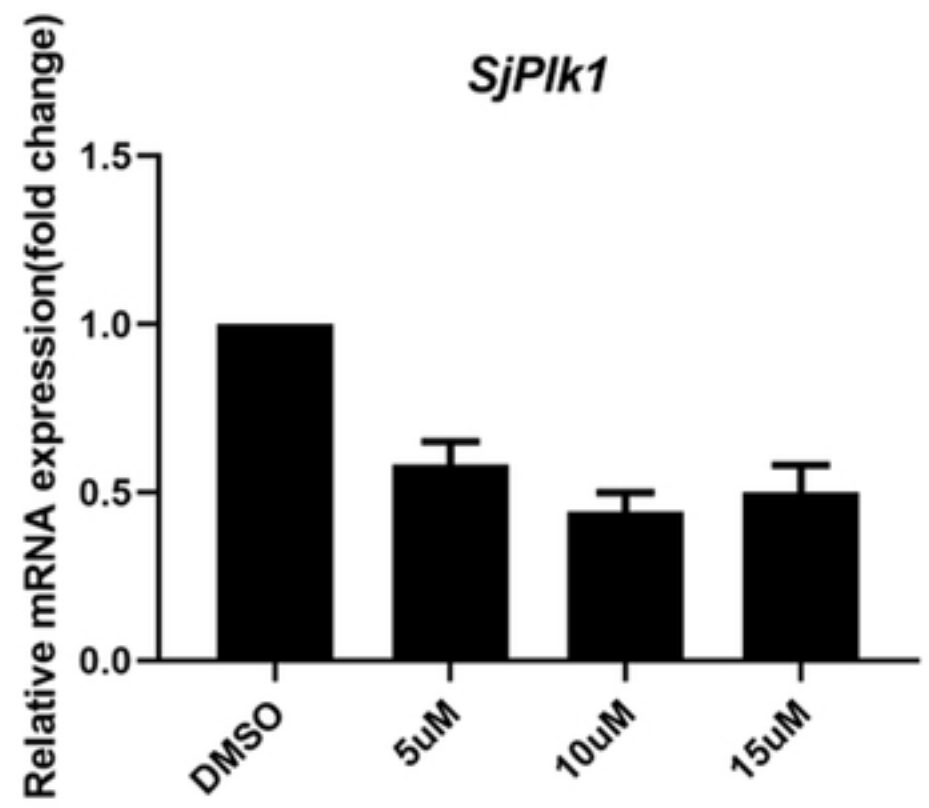**D**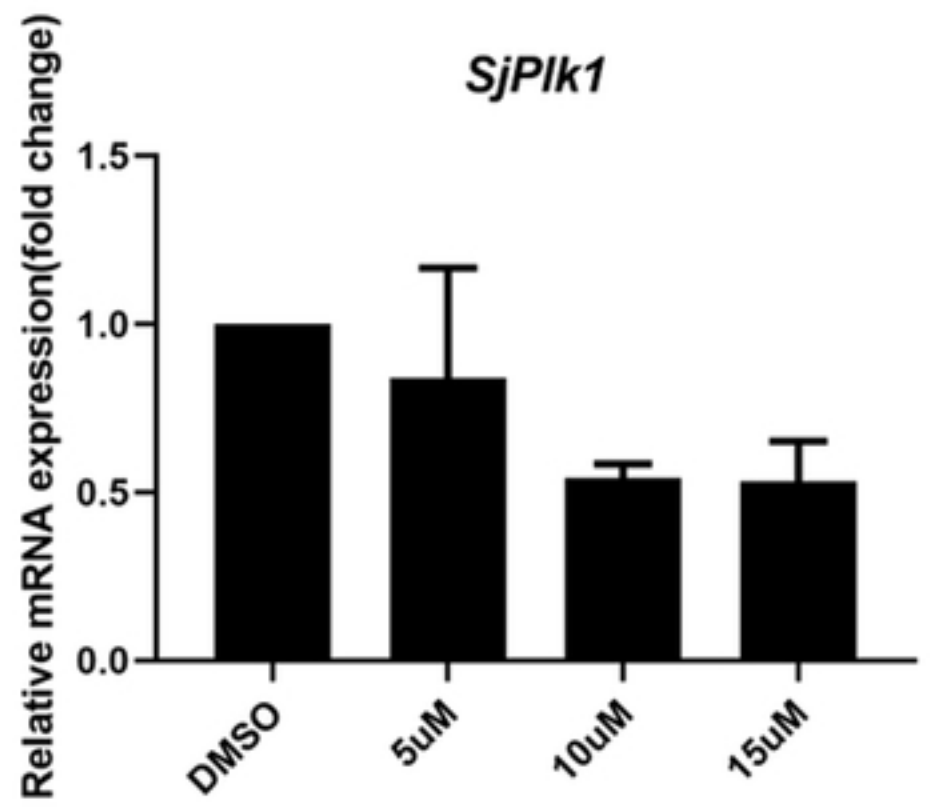

Figure.5



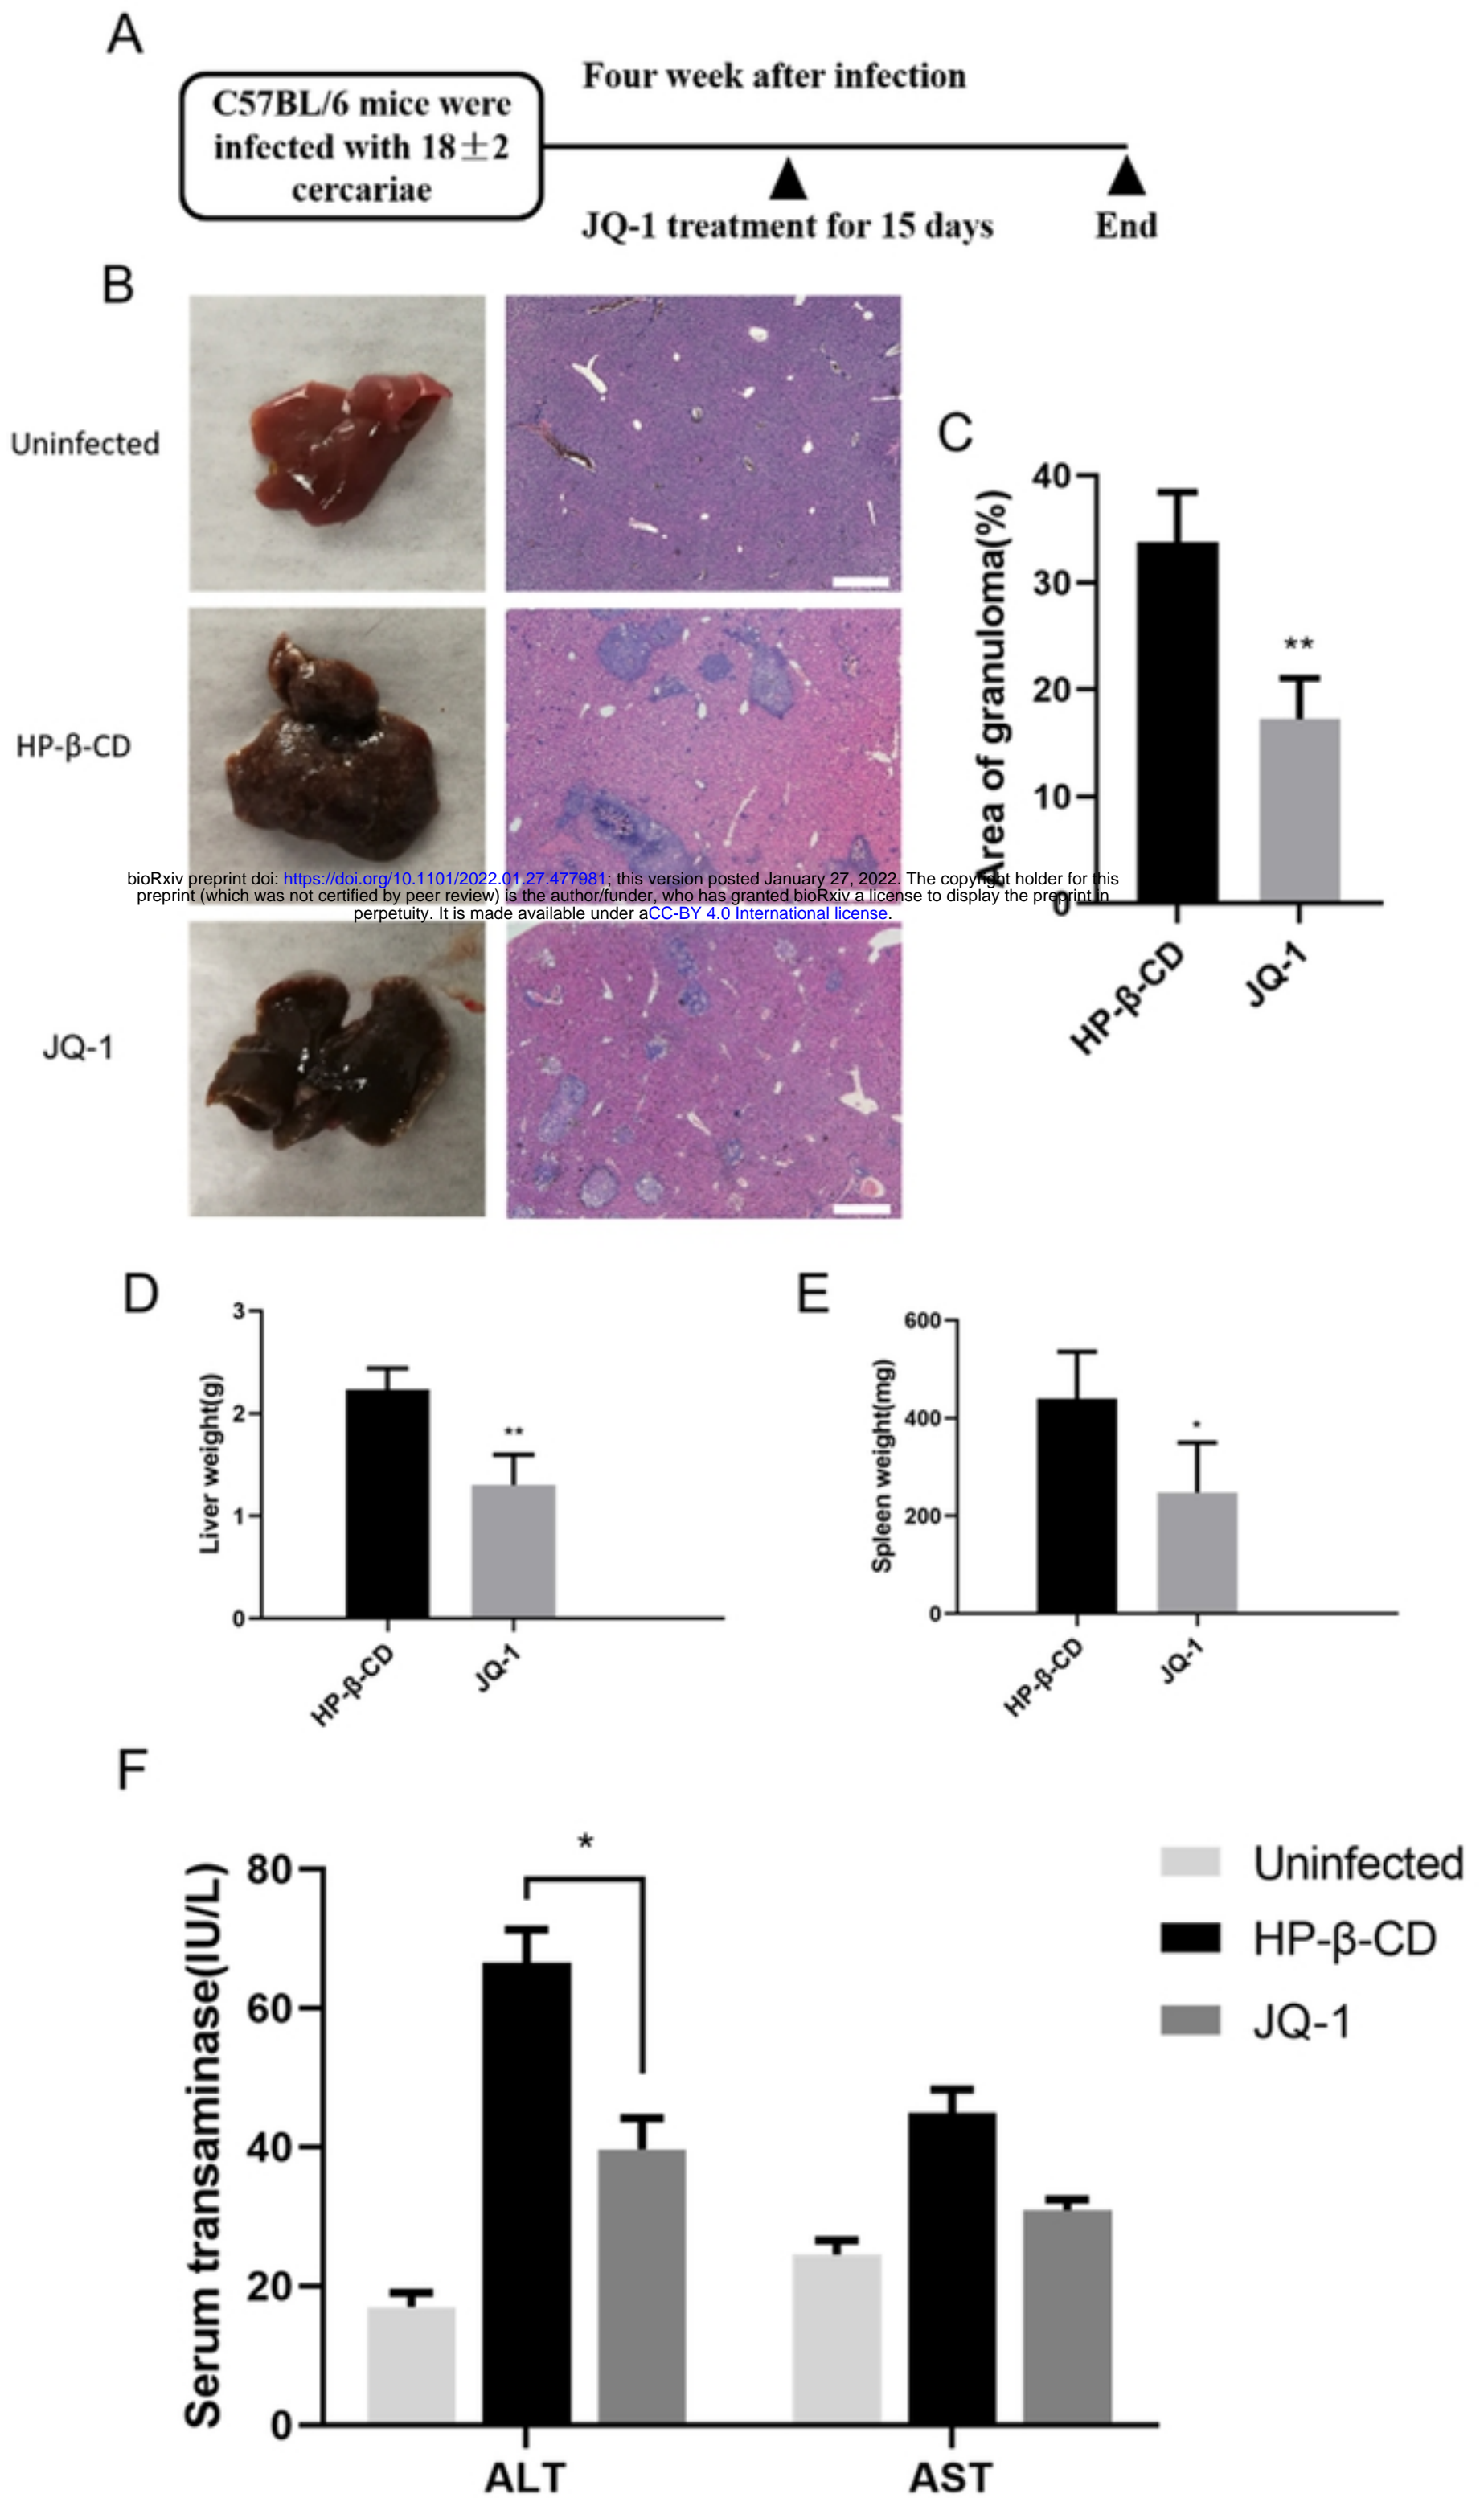

Figure.6

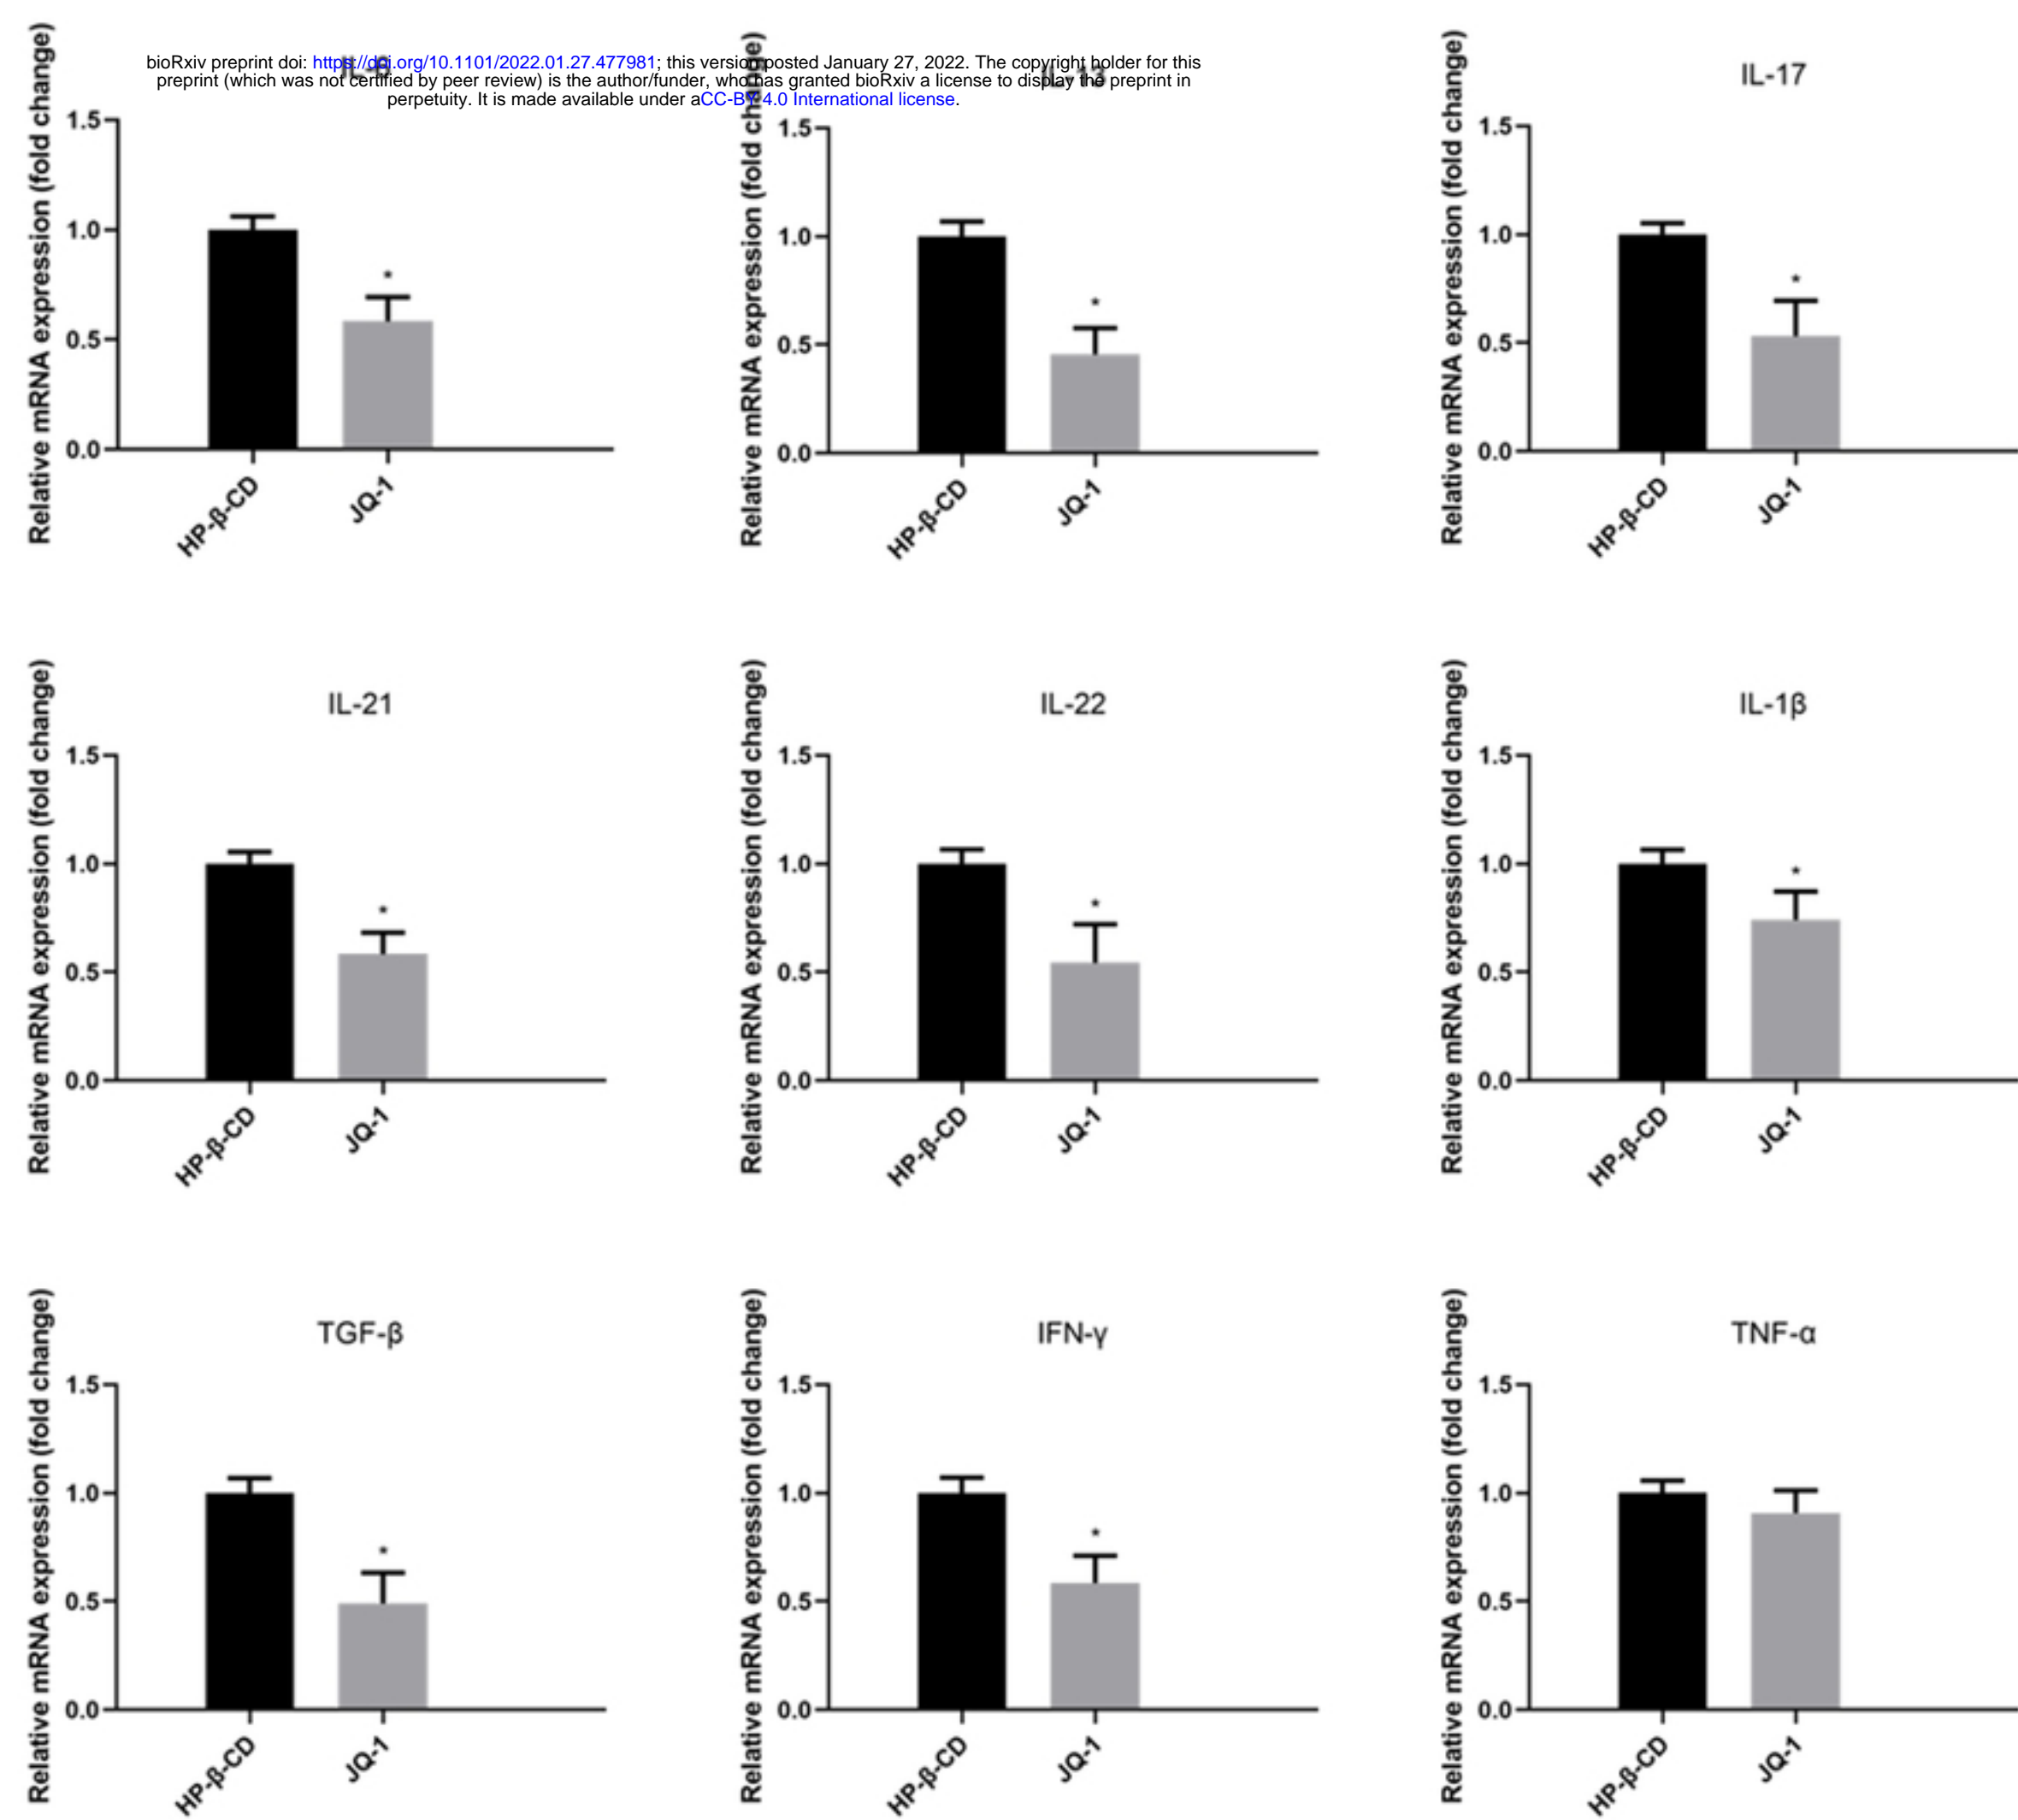

Figure.7

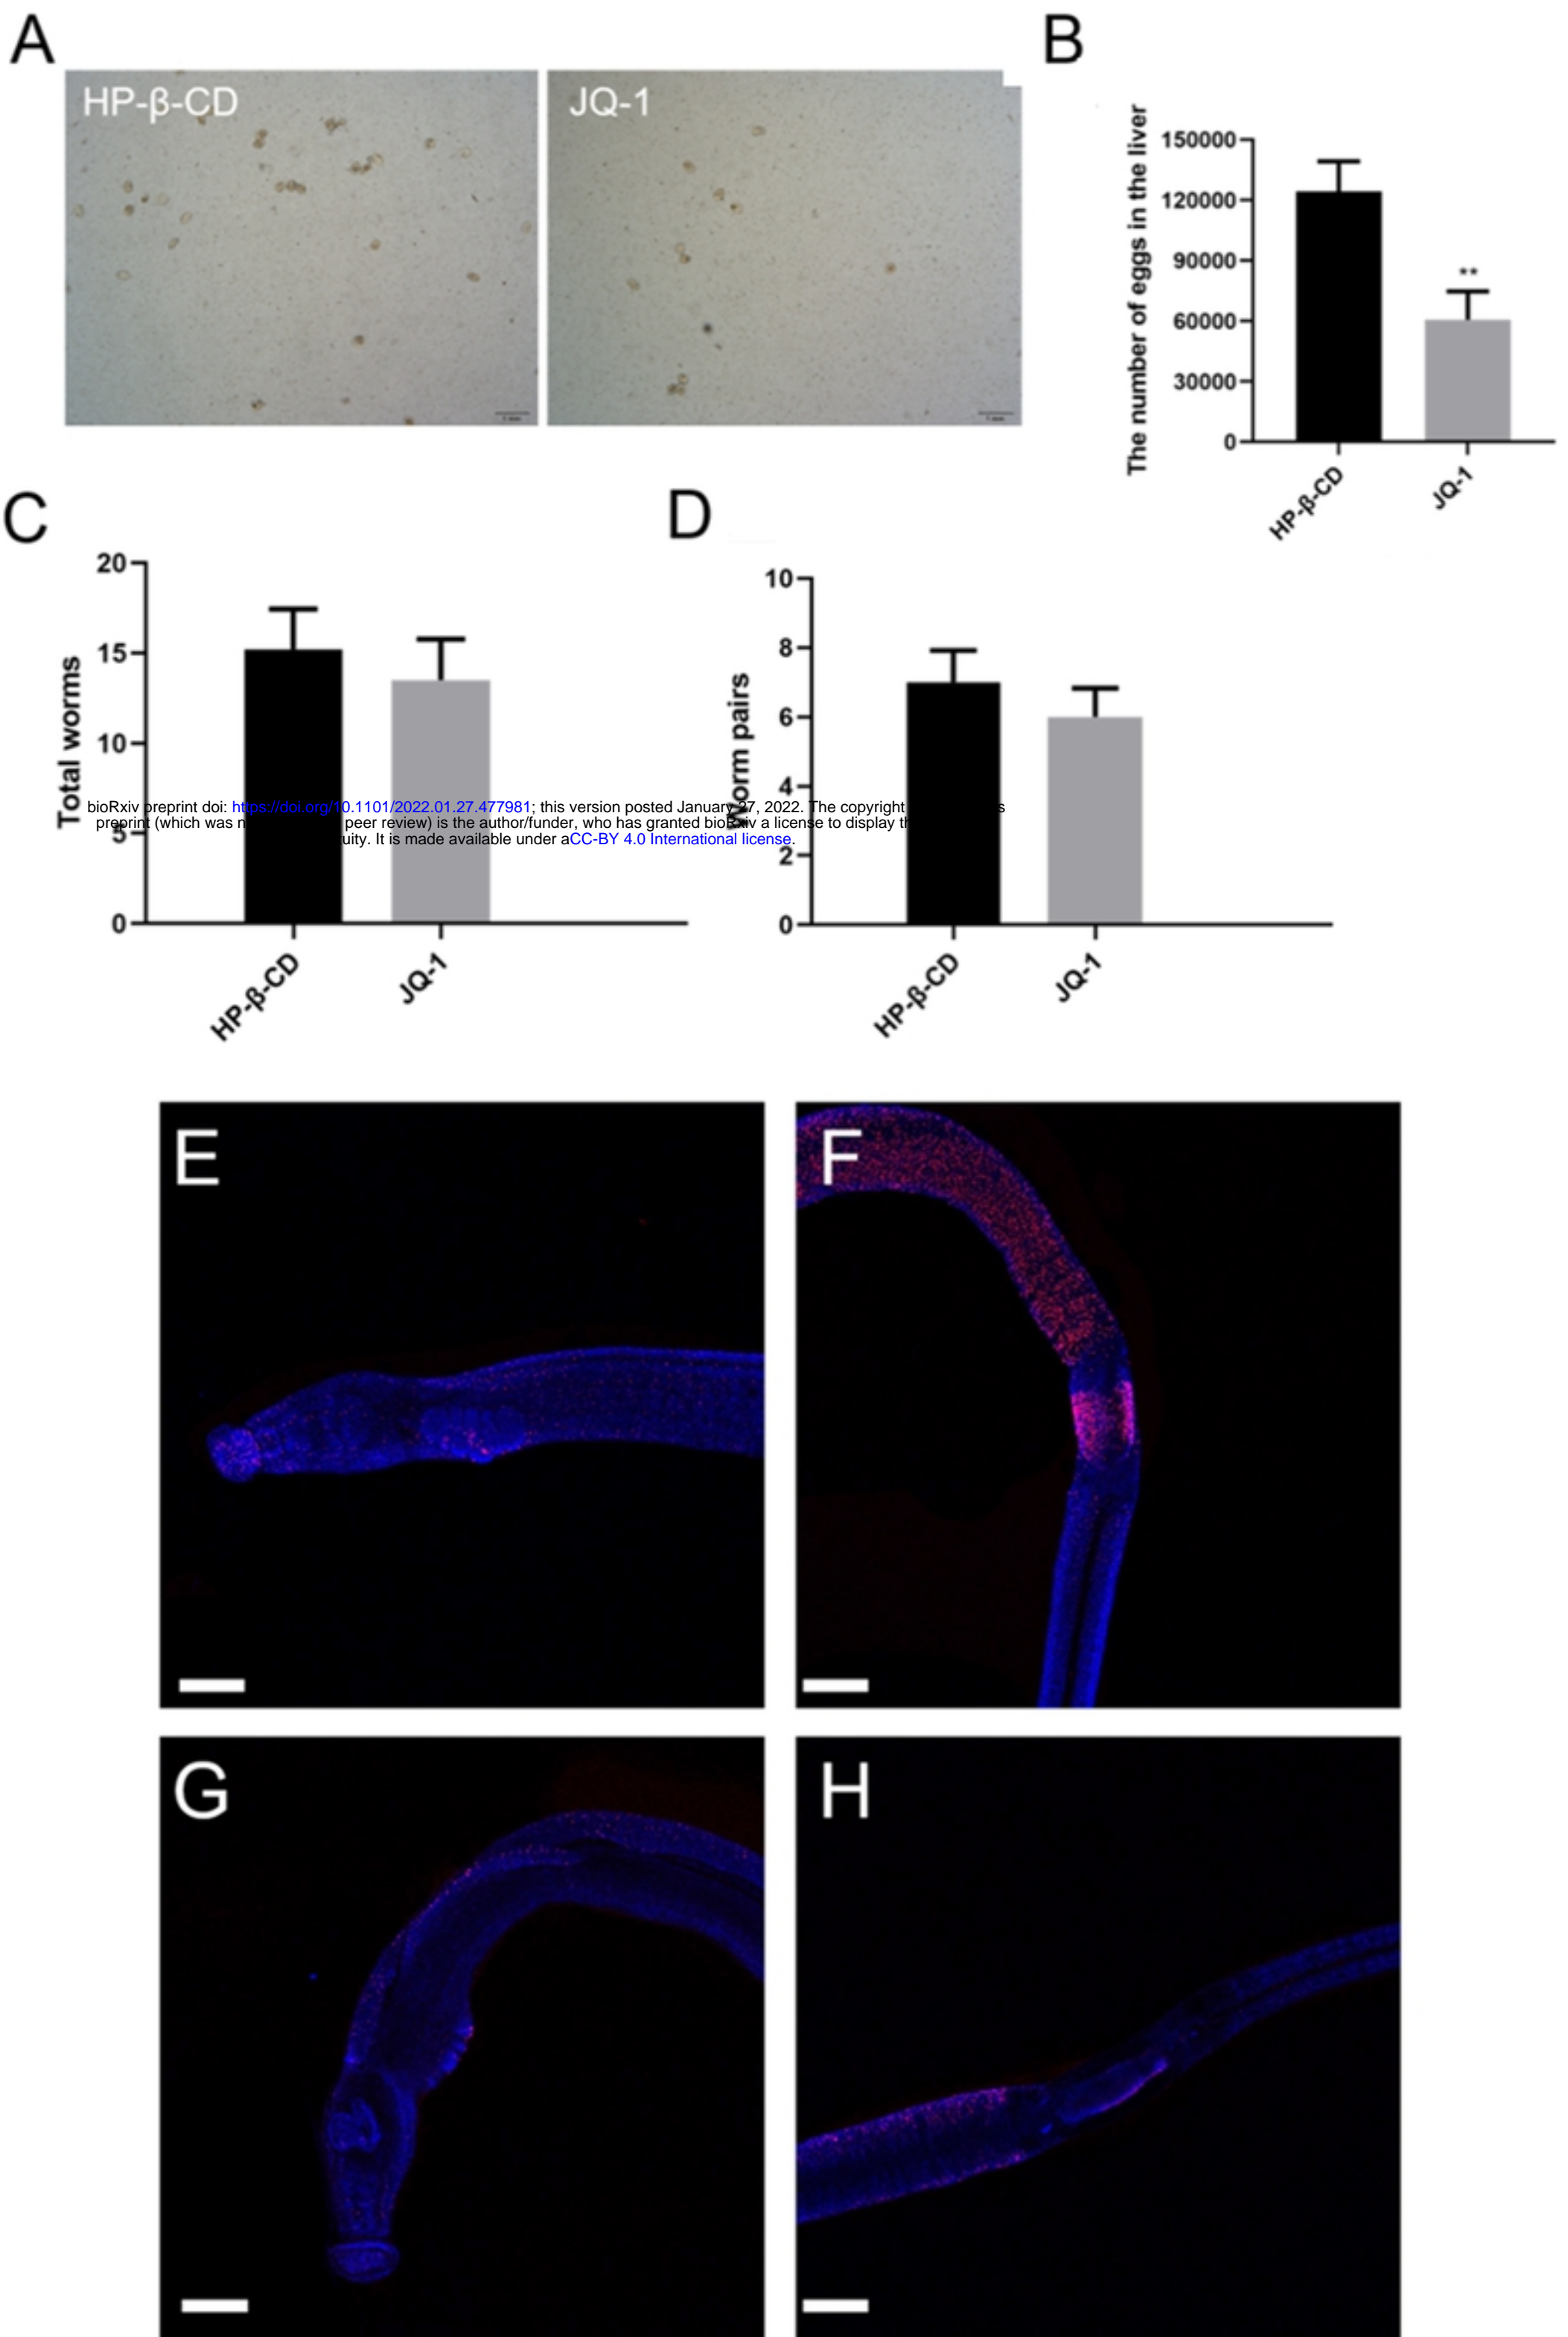

Figure.8

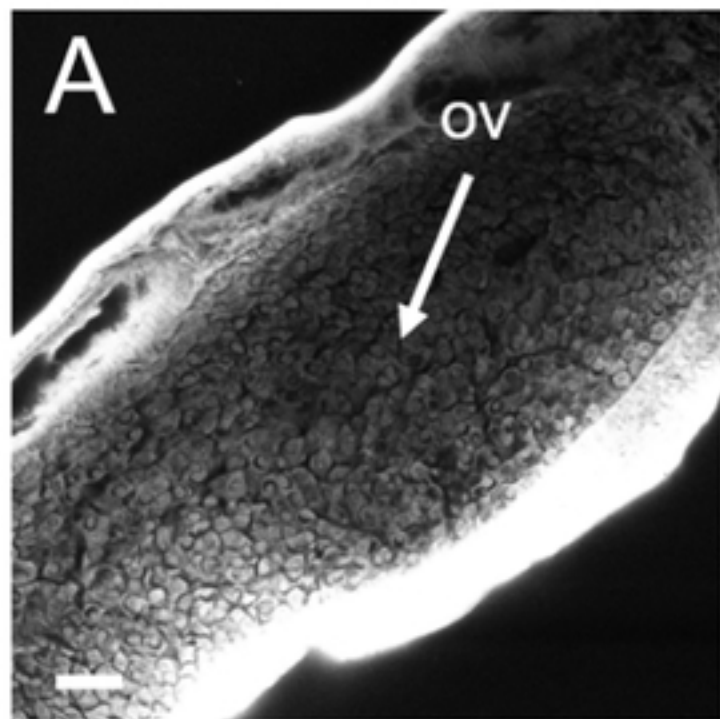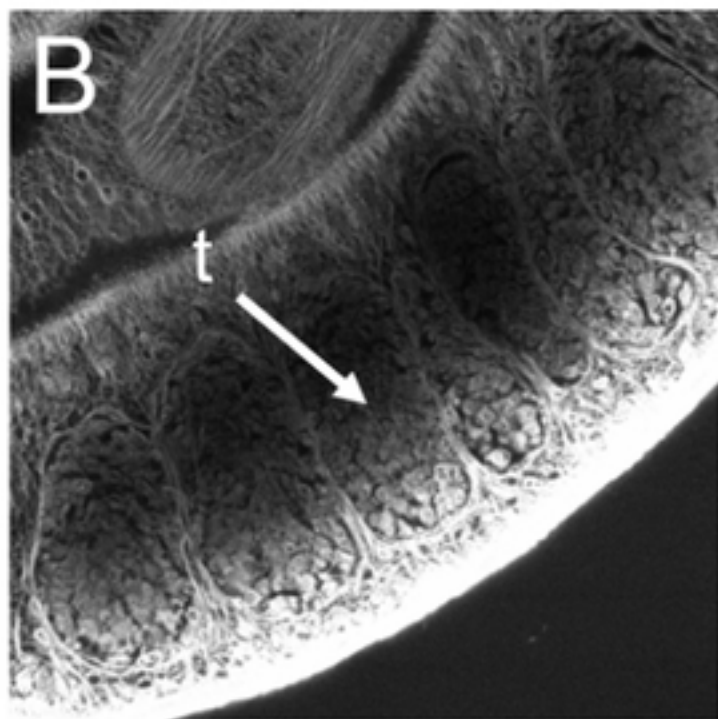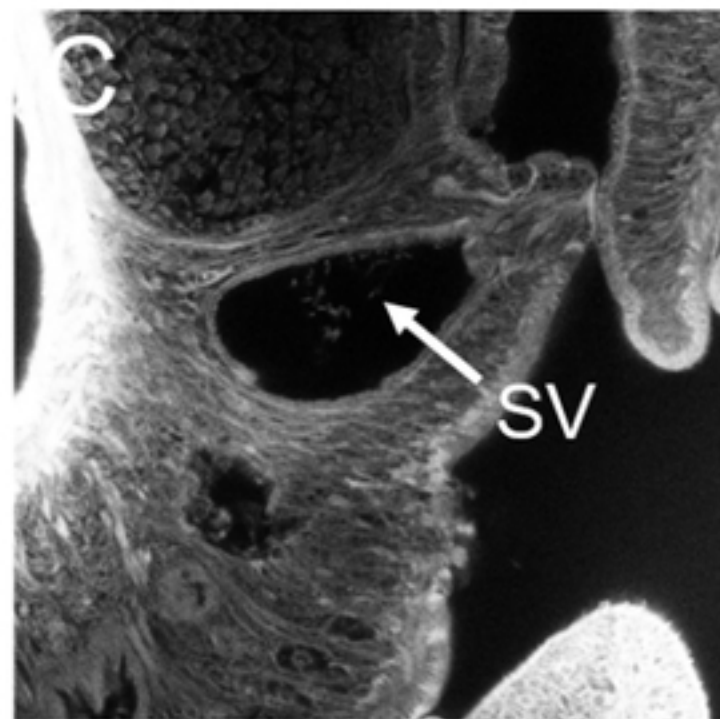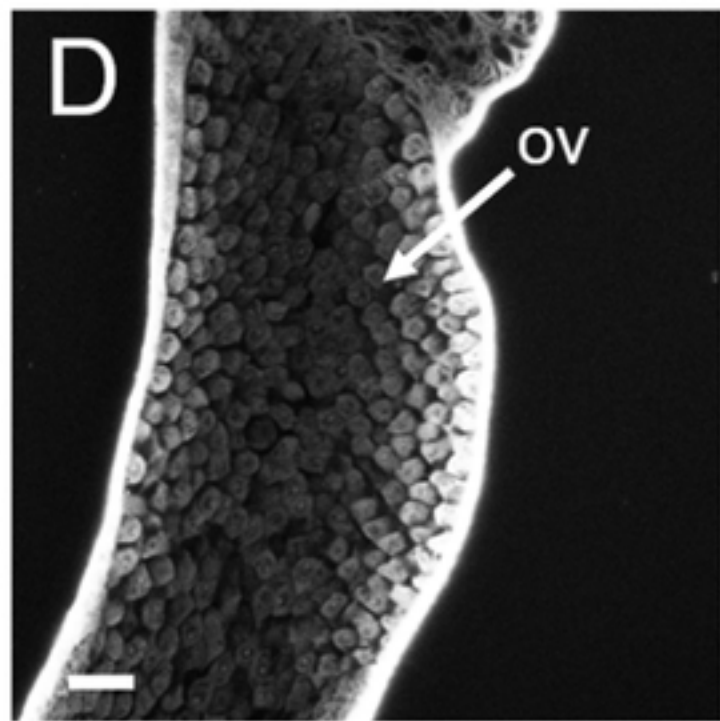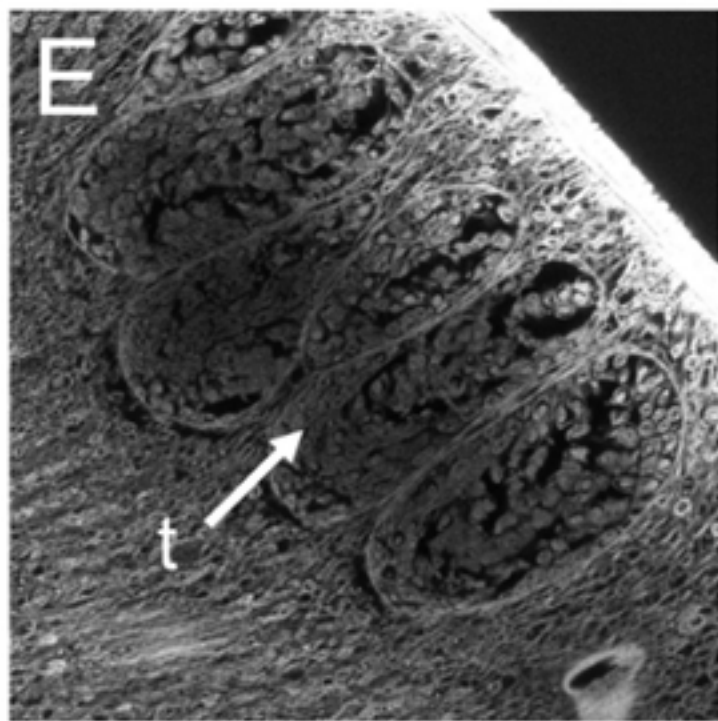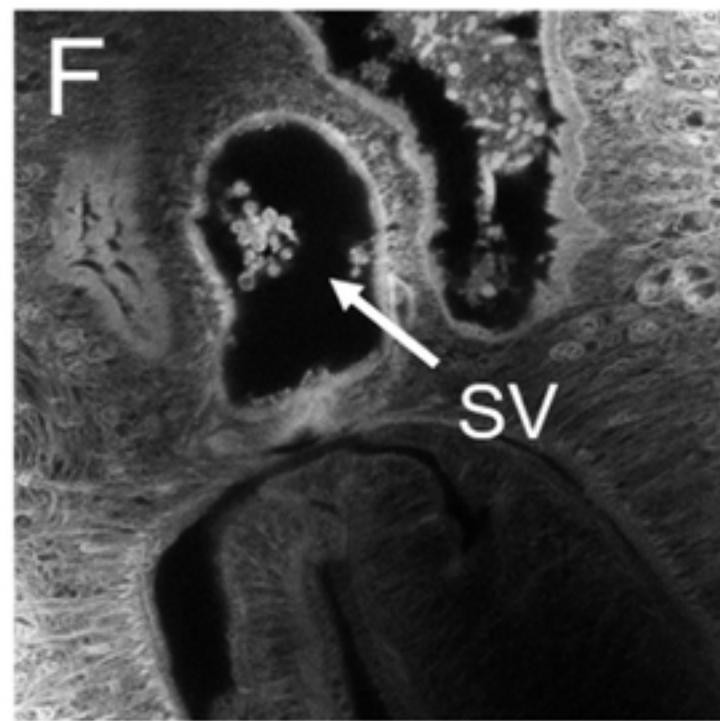

Figure.9
